# Supplementary material
Source: Research Square preprint supplement (doi:10.21203/rs.3.rs-9564543/v1)
Supplement: Supplementary file 1 [file 1c4199bc42be5476cda0eb08.xlsx]

## Sheet: raw data
번호	학교급	성별	키	몸무게kg	나이	BMI	PAPS	Sedentary	Light	Moderate	Vigorous	MVPA	Optimism	QoL	7-1. 나는 항상 모든 일에 좋은 결과가 있을 것이라고 생각하는 편이다.	7-2. 나는 어려운 일도 먼저 긍정적으로 생각하는 편이다.	7-3. 나는 힘든 일이 생겨도 앞으로 잘될 것이라고 생각하는 편이다.	7-4. 나의 미래에 대해 항상 긍정적으로 생각하는 편이다.	7-5. 나는 항상 좋은 쪽으로 생각하는 편이다.	7-6. 어떤 일을 마치면, 주변 사람들이 나를 격려해 줄 것이라고 믿는다.	1-1. 나의 신체적 건강은?	1-2. 나의 체력은?	1-3. 나의 체형은?	1-4. 나의 전체적인 외형은?	1-5. 나의 운동(신체활동) 수준은?	2-1. 다른 사람과의 관계는?	2-2. 다른 사람과의 친밀함은?	2-3. 나의 인간관계의 시작과 유지는?	2-4. 다른 사람과의 정서적 관계는?	2-5. 나의 사회적 관계는?	3-1. 나의 집중력은?	3-2. 나의 사고력(생각하는 능력)은?	3-3. 나의 문제해결 능력은?	3-4. 나의 기억력은?	3-5. (새로운 것을) 배우는 능력은?	4-1. 편안한 느낌	4-2. 행복한 느낌	4-3. 평온한 느낌	5-1. 일상생활에서의 자기관리	5-2. 일상생활에서의 활동 능력(일상생활 신체활동)	5-3. 일상생활에서의 이동(움직임) 능력	6-1. 나의 전반적인 삶의 질은?	6-2. 나의 전반적인 삶의 즐거움 정도는?	6-3. 나의 대체적인 삶은?	6-4. 나의 삶의 전반적인 행복 수준은?	7-1. 기도, 명상 또는 정신적 준비나 노력	7-1. 기도, 명상 또는 정신적 준비나 노력	7-3. 나의 정신적 또는 종교적 소신 수준은?	7-4. 나의 정신적인 삶 또는 종교 생활 수준은?
1	1	1	167	93	15	33.3465	3	8927.17	876.167	255.833	19.8333	275.667	4	3.51429	4	4	4	4	4	4	3	3	2	3	3	4	4	4	4	4	4	4	4	3	4	4	4	4	3	3	3	4	4	4	4	3	3	3	3
2	1	1	155.2	45.9	15	19.0559	4	8884	1073.83	84.5	36.6667	121.167	2.83333	2.65714	3	3	3	2	3	3	3	4	3	3	3	3	3	3	3	2	2	2	2	2	2	2	2	2	3	3	3	3	3	3	3	3	2	3	2
3	1	1	161	57	15	21.9899	1	9296	410	323.667	49.3333	373	4	4.37619	3	5	3	3	5	5	5	5	3	5	5	5	5	5	5	5	2	5	5	3	4	5	5	5	3	5	5	4	5	5	4	3	3	4	3
4	1	1	162	66.1	15	25.1867	1	8893.83	988.667	138.667	57.8333	196.5	2.33333	2.5619	2	2	2	2	3	3	3	3	3	2	2	3	3	4	3	4	2	2	2	3	2	2	2	3	2	2	2	4	4	4	4	1	3	1	1
5	1	1	165.3	50.3	15	18.4087	2	8728.5	1087	186.833	76.6667	263.5	3.83333	3.65	4	4	4	4	3	4	4	4	4	4	3	5	5	4	4	4	4	3	4	3	4	4	3	4	3	3	4	4	4	4	3	3	3	3	3
6	1	1	162.5	53.5	15	20.2604	3	9747.67	149.167	159.167	23	182.167	3.16667	3.9619	3	3	3	3	3	4	4	3	3	4	4	5	5	5	5	4	3	3	4	4	4	4	4	4	5	4	4	4	4	4	4	4	4	3	3
8	1	1	160.8	53.5	15	20.691	6	9479.67	314.167	177	108.167	285.167	4.83333	4.74286	5	5	5	4	5	5	5	5	3	5	3	5	5	5	5	5	4	5	5	5	5	5	5	5	5	5	5	5	5	5	5	3	3	5	5
9	1	1	152.8	48.3	15	20.6871	5	9649.17	154	261	14.8333	275.833	3.66667	3.94286	4	3	3	4	4	4	4	4	4	5	4	4	4	4	4	4	4	4	4	4	3	4	4	4	4	4	4	4	4	4	4	4	4	4	3
10	1	1	156.8	49.2	15	20.0112	3	8931.83	837	240.5	69.6667	310.167	4.66667	4.62857	4	5	5	4	5	5	5	5	5	5	5	5	5	5	5	5	3	5	5	3	5	5	5	5	5	5	5	5	5	5	5	3	3	3	3
11	1	1	166.4	42.7	15	15.4213	2	9022.83	905.833	112.667	37.6667	150.333	2.83333	3.26667	3	3	3	3	2	3	3	3	3	3	4	4	4	4	4	4	3	3	3	3	3	3	3	3	3	4	4	3	3	3	3	3	3	3	3
14	1	1	165.9	46.8	15	17.0041	2	8549.83	1259	248.167	22	270.167	3.5	3.26667	4	4	4	1	4	4	3	3	4	4	3	4	4	3	4	4	4	4	3	3	3	4	4	3	3	3	3	3	3	3	3	2	2	3	3
15	1	1	151.6	64.8	15	28.1953	6	8898.67	950.667	170	59.6667	229.667	2.83333	3.87857	3	3	3	3	3	2	4	3	3	4	2	5	5	5	5	5	3	4	3	4	4	5	5	3	4	3	4	4	5	5	5	3	1	3	3
17	1	1	168.1	52.4	15	18.5437	1	9499.17	353.833	192.667	33.3333	226	3	2.94286	3	3	3	3	3	3	3	3	3	3	3	3	3	3	3	3	3	3	3	3	3	3	3	3	3	3	3	3	3	3	3	1	3	3	3
18	1	1	173	61.6	15	20.582	6	9167	773	107.833	31.1667	139	2.66667	2.65714	3	2	2	3	3	3	3	2	2	2	2	3	3	3	3	3	1	2	1	2	1	3	3	3	3	3	3	3	3	3	3	3	3	3	3
19	1	0	158.9	55.9	15	22.1393	1	9607.17	222.833	231.833	17.1667	249	3.33333	3.58095	3	3	3	3	4	4	4	4	3	4	3	4	3	4	4	4	3	4	4	3	3	4	4	4	3	4	4	4	4	4	4	2	2	3	3
20	1	0	173	65	15	21.7181	1	8744	1008.5	225.667	100.833	326.5	4.83333	4.5619	5	5	5	5	4	5	5	5	5	4	5	5	5	3	4	4	3	4	5	4	5	3	5	5	5	5	5	5	5	5	5	5	4	5	5
21	1	0	181	70	15	21.3669	1	9512.33	362.5	185.167	19	204.167	3.66667	3.17381	3	4	4	4	4	3	3	3	3	3	3	4	3	3	3	3	3	3	2	3	3	4	5	4	4	3	3	3	2	3	3	3	3	2	2
22	1	0	178	77	14	24.3025	6	9463.83	395.167	137.833	82.1667	220	3.5	3.13095	3	4	4	3	4	3	3	3	3	3	3	4	4	4	4	4	3	4	4	3	3	4	4	3	3	3	3	3	4	3	3	1	1	2	2
23	1	0	174	63	14	20.8086	1	9410.5	426.333	191	51.1667	242.167	3.66667	3.42857	4	3	4	3	4	4	4	4	3	4	4	4	4	4	4	4	4	4	4	4	4	3	3	3	3	3	3	3	3	3	3	3	4	3	3
24	1	0	181	75	14	22.8931	6	9314.33	286.667	361.833	116.167	478	4.83333	4.97143	5	4	5	5	5	5	5	5	5	5	5	5	5	5	5	5	5	5	5	5	5	5	5	5	5	5	5	5	5	5	5	5	4	5	5
25	1	0	173.1	66.6	15	22.227	1	9106.33	654.333	221.5	96.8333	318.333	4	3.90952	4	4	4	4	4	4	5	4	4	3	4	4	4	4	4	4	3	3	4	5	4	4	4	3	4	4	4	5	4	5	4	3	4	3	3
26	1	0	182	97	15	29.2839	1	8726.17	1034.17	172.833	145.833	318.667	4.83333	4.91429	5	4	5	5	5	5	5	4	3	5	5	5	5	5	5	5	5	5	5	5	5	5	5	5	5	5	5	5	5	5	5	5	5	5	5
27	1	0	168.3	62.3	15	21.9948	1	9150.67	665.333	188.667	74.3333	263	3	3.2	3	3	3	3	3	3	4	3	3	3	3	4	5	4	4	4	3	4	3	3	3	3	3	3	3	3	3	3	3	3	3	3	2	3	3
28	1	0	168.6	58.5	15	20.5798	6	9111.5	746.5	190.667	30.3333	221	3	3.25714	3	3	3	3	3	3	5	5	5	5	5	3	3	3	3	3	3	3	3	3	3	3	3	3	3	3	3	3	3	3	3	3	2	3	3
29	1	0	180	67	15	20.679	1	9065	654.333	247.5	112.167	359.667	4.83333	4.91429	5	5	4	5	5	5	5	5	5	5	5	5	5	5	5	5	5	5	5	5	5	5	5	5	5	5	5	5	5	5	5	3	4	5	5
30	1	0	171.6	67.2	15	22.821	1	9137.17	639.333	199.167	103.333	302.5	4.83333	4.97143	4	5	5	5	5	5	5	5	5	5	5	5	5	5	5	5	5	5	5	5	5	5	5	5	5	5	5	5	5	5	5	4	5	5	5
31	1	0	178.6	66.6	15	20.8791	1	8962.17	733.167	327.5	56.1667	383.667	2.66667	4	2	3	3	3	3	2	5	5	5	5	5	5	5	5	5	5	5	5	5	5	5	5	5	5	5	5	5	1	1	1	1	2	1	1	4
32	1	0	174.3	55.8	15	18.3671	1	9436.5	444	165.667	32.8333	198.5	3.16667	3.05714	3	3	3	3	3	4	3	3	3	3	4	5	3	3	4	4	4	4	3	3	3	3	3	3	3	3	3	3	3	3	3	2	2	2	2
33	1	0	178.7	69.8	15	21.8578	1	9139.67	610.833	170.167	158.333	328.5	4.5	4.97143	5	5	5	5	2	5	5	5	5	5	5	5	5	5	5	5	5	5	5	5	5	5	5	5	5	5	5	5	5	5	5	4	5	5	5
34	1	0	177.2	78.3	15	24.9364	2	8910.33	902	181	85.6667	266.667	4.83333	4.19048	5	5	5	5	4	5	5	4	4	3	4	4	5	4	4	4	4	4	4	4	5	5	4	4	4	4	4	4	4	4	4	5	5	4	4
36	1	0	170.2	89.7	15	30.9652	4	8960.33	924.833	163.5	30.3333	193.833	3	2.97143	3	3	3	3	3	3	3	3	3	3	3	3	3	3	3	3	3	3	3	3	3	3	3	3	3	3	3	3	3	3	3	3	2	3	3
37	1	0	172.6	55.3	15	18.5628	1	8666.17	1048	186.5	178.333	364.833	5	4.82857	5	5	5	5	5	5	4	4	4	4	4	5	5	5	5	5	5	5	5	5	5	5	5	5	5	5	5	5	5	5	5	5	4	5	5
38	1	0	185	94.7	15	27.6698	2	9454.67	376.167	122.5	125.667	248.167	4	3.82857	4	4	4	4	4	4	4	3	3	3	3	4	4	4	4	4	4	4	4	4	4	4	4	4	4	4	4	4	4	4	4	4	2	4	4
39	1	0	156	42	15	17.2584	4	9165.33	728.5	174.167	11	185.167	2.66667	2.90952	2	3	3	3	2	3	2	1	3	3	1	3	3	3	3	3	2	3	3	2	3	5	4	4	2	2	3	3	4	3	4	2	2	3	3
40	1	0	163.4	56.2	13	21.049	1	8654.83	1191.17	138.5	94.5	233	3.66667	3.41429	4	3	4	3	4	4	5	5	5	5	5	4	4	4	4	4	4	4	4	4	4	2	3	2	3	4	4	4	3	4	3	2	2	1	1
42	1	0	158.8	44	13	17.4482	6	8966.5	855.33	167	90.17	257.17	4	3.49524	4	4	4	4	4	4	3	3	3	5	4	5	5	4	4	4	3	3	3	3	3	4	5	4	3	3	4	4	4	4	4	3	3	1	1
43	1	0	165	73.9	13	27.1442	6	8649	1178.67	178.5	72.83	251.33	4.83333	4.17143	5	5	5	5	4	5	5	3	3	3	4	5	5	5	5	5	5	5	5	4	5	5	5	4	5	4	4	5	5	5	5	4	2	1	1
44	1	0	156.9	54.5	13	22.1386	2	8298.84	1538.33	169.83	72	241.83	3.16667	3.80238	4	3	3	3	3	3	4	4	4	4	4	4	4	4	4	4	4	4	3	4	4	4	3	4	4	4	4	4	4	4	3	3	3	4	4
45	1	0	161.8	47.5	13	18.1441	1	7976.84	1700.83	229.33	172	401.33	4	4.34286	4	4	4	4	4	4	5	5	5	5	5	5	5	4	4	4	4	4	4	3	5	4	5	4	4	5	5	4	4	4	4	4	4	4	4
46	1	0	164.2	61.6	13	22.8473	2	8304.83	1506	165	103.17	268.17	3.5	3.20476	3	4	4	3	3	4	4	3	4	3	3	5	4	4	4	4	2	4	4	1	4	1	5	3	3	3	4	3	4	3	4	3	2	2	2
47	1	0	159	47.8	13	18.9075	1	8879.66	994.17	150	55.17	205.17	4	3.98095	4	4	4	4	4	4	5	5	5	3	5	4	4	4	4	4	4	4	4	3	4	4	4	4	3	4	4	4	4	4	4	4	3	4	4
49	1	0	152.8	50.6	13	21.6722	3	8701.67	1070.5	219	87.83	306.83	4.83333	4	5	5	5	5	5	4	4	4	4	4	4	4	4	4	4	4	5	4	4	4	4	4	4	4	4	4	4	4	4	4	4	4	3	4	4
50	1	0	158.2	51.9	14	20.7374	3	8697.34	1121.33	171.5	88.83	260.33	3.83333	4.00238	5	3	3	4	4	4	4	3	4	3	3	5	5	5	5	5	4	3	3	4	4	4	5	5	4	4	4	3	3	4	5	3	3	4	4
51	1	0	158.2	78	14	31.166	3	9060.5	792.33	140.5	85.67	226.17	3	4.05714	3	3	3	3	3	3	4	4	4	4	4	4	4	4	4	4	4	4	4	5	4	4	4	4	4	4	4	4	4	4	4	4	5	4	4
52	1	0	169.1	80.4	14	28.117	3	8795.16	1061.67	173.5	48.67	222.17	3	2.96667	3	3	3	3	3	3	2	2	2	3	2	3	3	3	3	3	4	4	2	2	3	3	3	3	3	2	3	4	5	5	4	2	1	3	3
53	1	0	163.1	49.5	14	18.6079	2	8899.84	777.83	258.33	143	401.33	5	4.48571	5	5	5	5	5	5	5	5	4	5	5	5	5	5	5	5	5	5	5	5	5	5	5	5	5	5	5	5	5	5	5	3	2	1	1
54	1	0	147.1	43.2	13	19.9645	2	8009.33	1632.17	329.83	107.67	437.5	4.66667	4.39286	5	5	5	5	4	4	5	5	4	4	5	5	5	5	5	4	4	5	5	4	5	4	5	4	4	5	5	5	5	5	4	3	3	3	3
55	1	0	170.1	73.3	14	25.3335	2	9054.84	743.33	154.16	126.67	280.83	4	4.15238	4	4	4	4	4	4	4	4	4	4	4	4	4	4	4	4	4	4	4	4	4	4	4	4	4	5	5	4	4	4	4	4	4	5	4
56	1	0	172.1	89.7	15	30.2852	3	8904	697.5	301.5	176	477.5	4	3.89524	4	4	4	4	4	4	4	4	4	4	4	4	3	4	4	4	4	4	4	4	4	4	3	4	4	4	4	4	4	4	4	4	3	4	4
57	1	0	168.4	64.2	15	22.6387	3	9524.17	283.5	179.83	91.5	271.33	4.16667	3.54524	4	4	4	4	5	4	4	4	3	3	4	4	4	3	4	3	3	3	4	4	3	4	4	3	4	4	4	3	4	4	4	4	2	2	3
58	1	0	175.7	71.7	14	23.2261	2	9192.66	506.17	282.84	97.33	380.17	5	4.68571	5	5	5	5	5	5	5	2	3	3	4	5	5	5	5	5	5	5	5	3	5	5	5	5	5	5	5	5	5	5	5	5	4	5	5
59	1	0	160.3	49.4	16	19.2247	2	9223.17	396.33	320.17	139.33	459.5	4	4.71429	3	5	4	4	3	5	5	5	5	4	5	5	5	5	5	5	5	5	5	5	5	5	5	5	5	5	5	5	5	5	5	4	3	3	3
60	1	1	158.3	51	13	20.3521	3	8992.66	787.17	248.17	51	299.17	5	3.8	5	5	5	5	5	5	4	4	4	4	4	4	4	4	4	4	4	4	4	4	4	4	4	4	4	4	4	4	4	4	4	2	2	3	3
61	1	1	152.8	35.5	13	15.2048	6	8665	1097.5	303.17	13.33	316.5	4.33333	4.77143	5	5	5	5	5	1	5	5	5	5	5	5	5	5	5	5	5	5	5	5	5	5	5	5	5	5	5	5	5	5	5	1	1	5	5
62	1	1	152.9	50.7	13	21.6867	4	8511.67	1362.33	157.83	47.17	205	3	3.02857	3	3	3	3	3	3	3	4	3	3	3	3	3	3	3	3	3	3	3	3	3	3	3	3	3	3	3	3	3	3	3	3	3	3	3
63	1	1	151.4	36.8	13	16.0545	2	8243.5	1614.67	160.16	60.67	220.83	3.16667	3.64048	3	3	3	3	3	4	5	4	3	4	3	4	5	4	5	5	1	3	3	5	3	3	4	3	4	4	4	4	4	4	3	3	3	3	3
64	1	1	156.9	47.2	14	19.1733	1	8770.33	977.5	207.17	124	331.17	4.33333	3.52143	5	5	5	3	4	4	4	4	3	3	4	4	5	4	4	5	4	4	3	4	5	3	3	3	2	5	5	3	3	4	3	1	1	5	1
65	1	1	159.6	46.4	14	18.216	2	9199.83	703.5	135.84	39.83	175.67	2.33333	3.25	2	2	3	2	2	3	4	3	3	3	3	3	3	3	4	3	4	4	3	4	4	3	3	4	4	4	3	4	4	4	3	1	1	2	3
66	1	1	164.9	78.7	14	28.9423	3	8493.67	1440.83	122.67	21.83	144.5	5	3.89524	5	5	5	5	5	5	4	3	3	3	3	5	5	4	4	5	5	5	5	5	5	5	5	5	3	2	3	5	5	5	5	3	3	1	1
67	1	1	157.9	48.3	14	19.3724	3	8923	972	169.83	14.17	184	3.33333	3.04762	4	3	3	4	3	3	3	4	4	3	3	3	3	3	3	3	2	4	4	3	3	3	3	3	3	3	4	4	4	4	4	2	2	1	1
68	1	1	160.3	58.6	14	22.805	2	8868.5	1037.83	144.67	28	172.67	2.83333	3.09524	1	3	3	4	3	3	4	3	3	3	5	4	4	3	3	3	2	3	3	3	3	3	3	3	3	4	4	3	3	3	3	2	2	2	2
69	1	1	156.5	58.8	14	24.0076	3	9013.83	815.5	159.17	90.5	249.67	2.83333	3.39286	4	3	1	2	3	4	4	3	3	3	3	3	3	4	4	4	4	4	3	3	4	4	4	4	3	3	3	3	4	4	4	3	3	2	2
70	1	1	165.2	85	14	31.1458	6	8830.17	1031.83	108.33	108.67	217	3	3.08571	3	3	3	3	3	3	3	5	3	3	4	3	3	3	3	3	3	3	3	3	3	3	3	3	3	3	3	3	3	3	3	3	3	3	3
71	1	1	161.4	59.3	15	22.764	3	8614.17	1199	209.66	56.17	265.83	4.66667	3.85714	5	5	5	4	5	4	3	3	3	3	3	5	4	5	5	5	3	5	3	3	1	5	5	5	4	4	4	5	5	5	5	4	4	1	1
72	1	1	158.7	43.3	15	17.1923	1	9282.67	672	92.16	32.17	124.33	2.5	2.74048	2	2	3	3	2	3	4	3	3	2	3	4	4	4	2	5	3	3	3	3	2	3	2	2	3	3	3	3	2	2	2	2	2	2	2
73	1	1	163.6	53.6	15	20.0262	2	9106.17	659.5	287.83	25.5	313.33	3.83333	3.3619	1	5	4	4	4	5	3	3	3	3	3	5	5	5	5	5	3	3	5	4	5	2	5	2	4	3	3	3	3	3	3	1	1	3	3
74	1	1	160	55.2	15	21.5625	1	8976.34	803.33	267.16	32.17	299.33	4	3.75952	3	4	4	4	4	5	3	4	4	4	4	4	4	4	3	4	4	4	3	4	4	4	5	4	2	4	4	5	4	4	4	3	3	3	2
75	1	1	155.4	79.9	15	33.086	4	8816	1039.83	111.5	111.67	223.17	4	3.94286	4	4	4	4	4	4	4	5	3	3	4	4	4	4	4	4	4	4	4	4	4	4	4	4	4	4	4	4	4	4	4	4	3	4	4
76	1	1	163.6	76.5	15	28.5821	2	8749.33	1112	136.34	81.33	217.67	3.33333	3.50476	3	4	4	3	3	3	3	3	2	3	2	4	4	4	4	4	4	4	4	4	5	4	4	4	2	2	3	4	4	4	4	3	4	3	4
77	1	1	166.2	54.7	15	19.8027	6	8878.16	962.67	168.5	69.67	238.17	3.33333	3.15	4	3	3	4	3	3	3	3	3	1	3	3	4	4	4	4	4	3	2	5	3	3	3	3	4	4	4	3	2	2	2	3	3	3	3
78	1	1	171.2	53.9	15	18.39	2	9336.5	521	197	24.5	221.5	3.33333	3.9119	3	4	1	4	4	4	4	3	4	4	4	4	4	4	4	4	4	5	4	3	4	3	4	4	4	4	3	4	4	5	4	4	4	4	4
79	1	1	161.7	69.2	14	26.4659	3	8915	990.67	145.16	28.17	173.33	3.33333	3.12381	4	3	3	4	3	3	2	2	2	3	3	4	4	5	4	4	3	4	4	5	4	2	3	3	3	3	3	4	4	4	4	1	1	2	2
80	1	1	171.3	68.3	15	23.2759	5	9172.17	801.333	93.1667	12.3333	105.5	1.66667	2.45714	2	2	2	1	2	1	2	2	1	1	2	3	4	4	4	4	2	2	2	3	3	4	2	3	2	2	2	3	3	3	3	1	1	3	1
81	1	1	166.2	52.1	15	18.8615	6	8735.33	1153.67	165.167	24.8333	190	3.33333	3.5881	4	3	3	3	3	4	5	4	4	3	4	4	4	4	4	4	4	4	4	4	4	4	4	4	3	4	4	3	3	3	4	1	1	3	3
82	1	1	158.3	45.3	15	18.0774	2	8722.67	1014.83	221.667	119.833	341.5	3.5	3.4119	1	4	4	4	4	4	2	3	3	3	3	4	4	4	4	4	3	3	3	3	3	3	4	3	4	4	4	3	4	4	4	3	3	3	3
83	1	1	164.1	68.5	14	25.4374	4	8387.67	1493	176.833	21.5	198.333	1	2.2381	1	1	1	1	1	1	3	3	1	1	1	3	3	3	3	4	2	1	3	2	3	1	2	1	2	2	3	3	3	3	3	3	3	1	1
84	1	1	169.2	56.3	15	19.6656	1	8469.5	1397.67	174.5	37.3333	211.833	3	3.4	3	3	3	3	3	3	4	4	5	4	5	3	4	4	4	3	3	3	3	4	4	4	4	4	3	3	3	4	4	4	4	1	1	2	2
85	1	1	162.2	50.3	15	19.119	6	8941.83	972.667	95.1667	69.3333	164.5	2	2.62857	2	2	2	2	2	2	3	2	3	2	2	3	3	3	3	3	1	3	2	3	3	3	3	3	2	2	2	3	3	3	3	3	1	3	3
86	1	1	163.9	56.7	14	21.1069	2	8770.17	1080.33	134.5	94	228.5	3.5	3.83095	3	3	4	4	3	4	4	4	3	3	4	4	4	4	4	4	4	4	4	4	4	4	4	4	3	4	4	3	4	4	4	3	4	4	4
87	1	1	160	56.9	14	22.2266	6	8540.83	1212.83	311.667	13.6667	325.333	4.66667	3.63095	4	5	5	5	5	4	3	3	2	3	4	5	5	5	5	5	3	5	5	4	5	5	5	2	3	3	2	2	5	3	5	3	3	3	3
88	1	0	163.8	52.1	15	19.4182	1	8595.17	1119.5	262.833	101.5	364.333	4.66667	4.43095	4	5	4	5	5	5	4	4	3	5	4	5	5	5	5	5	3	4	5	3	4	5	5	5	4	5	5	5	4	5	5	4	4	4	4
89	1	1	158	46.2	15	18.5066	1	8418.83	1444.83	172.833	42.5	215.333	3.83333	3.77143	4	4	3	4	4	4	5	3	3	3	4	5	4	4	5	4	3	3	3	3	5	5	5	5	3	3	3	4	4	4	4	2	2	3	3
90	1	1	161.2	52.1	15	20.0497	3	9325	569	169.333	15.6667	185	2.33333	2.8381	2	2	2	3	2	3	3	2	3	3	2	3	3	3	3	3	3	3	3	3	3	3	3	3	3	3	2	3	3	3	3	3	1	3	3
91	1	1	169.3	58	14	20.2355	1	8455	1367.33	123.167	133.5	256.667	3.83333	3.81429	4	4	4	5	3	3	5	5	5	5	5	5	5	4	4	4	3	4	4	4	4	4	4	4	3	4	5	4	4	3	3	2	2	2	2
92	1	1	160.1	50.4	14	19.6629	2	9058.17	830.333	160.167	30.3333	190.5	2.66667	4.1619	1	5	4	1	3	2	3	2	2	3	3	5	5	5	5	5	3	4	3	3	5	5	5	5	5	3	2	5	5	5	5	5	3	5	5
93	1	1	162.5	57	15	21.5858	4	8612.83	1200.67	232.167	33.3333	265.5	4	3.25714	1	5	5	5	5	3	3	3	3	3	3	4	4	3	3	3	4	3	3	3	3	3	3	3	3	3	3	3	3	3	3	3	3	5	5
94	1	1	153.2	45.1	15	19.2158	6	9445.5	433.167	184.5	15.8333	200.333	3.16667	3.05714	3	3	3	3	4	3	3	3	3	3	3	4	4	3	3	3	3	3	3	3	3	3	3	3	3	3	3	3	3	3	3	3	3	3	3
95	1	0	167.6	56.3	15	20.0429	2	9238.17	445.833	268.333	126.667	395	4	3.62857	4	4	4	4	4	4	5	4	3	3	4	4	4	4	4	4	4	4	3	3	3	3	3	3	4	4	4	4	4	4	4	4	3	3	3
96	1	0	167.8	53.2	15	18.8942	4	9415.33	495	159.5	9.16667	168.667	2.5	2.27619	2	5	2	2	2	2	2	2	2	2	1	2	2	3	3	3	4	4	4	4	4	1	2	1	2	2	2	2	2	2	2	2	1	2	3
97	1	0	173.1	60	15	20.0243	1	8677.83	1067.67	201.167	132.333	333.5	4	4.17619	4	4	4	4	4	4	5	5	3	4	5	4	5	4	4	4	4	4	4	5	4	4	4	4	4	4	5	5	4	5	4	3	3	4	4
98	1	0	175.9	78.6	14	25.4033	3	8964.67	833	245.667	35.6667	281.333	4.16667	3.50714	5	4	4	5	4	3	3	4	4	3	3	4	4	4	4	4	4	4	4	4	4	3	4	3	4	4	3	4	4	4	3	3	1	3	3
99	1	0	172.2	62.3	14	21.0098	2	8800.17	1013	214.5	51.3333	265.833	4.16667	3.53333	5	3	5	4	3	5	4	3	2	4	4	4	4	4	4	4	3	4	4	2	5	5	4	4	3	4	2	3	5	4	4	3	2	3	3
100	1	0	175.1	85.6	14	27.9191	3	9171.5	544.833	274.333	88.3333	362.667	4.83333	4.97143	5	5	5	4	5	5	5	5	5	5	5	5	5	5	5	5	5	5	5	5	5	5	5	5	5	5	5	5	5	5	5	5	4	5	5
101	1	0	175.3	73	15	23.7552	3	8319.17	1428	235.5	96.3333	331.833	4	3.59048	4	4	4	4	4	4	4	4	3	3	4	4	4	4	4	4	3	3	3	3	4	4	3	3	4	4	4	4	4	4	4	3	3	3	3
102	1	0	176.1	70.1	15	22.6047	4	8348	1444.33	247.833	38.8333	286.667	3.16667	3.93333	3	3	4	3	3	3	5	3	4	4	5	5	5	5	5	5	4	5	5	4	5	5	5	5	3	5	5	3	3	3	3	2	2	1	1
103	1	0	168.3	60.3	15	21.2887	3	8993.5	875.5	166	44	210	3.33333	3.04048	4	3	3	3	4	3	3	3	4	3	2	3	3	3	4	3	2	3	3	4	3	3	4	3	3	3	3	4	4	3	4	2	2	2	2
104	1	0	169.5	59.9	15	20.8491	2	9051.17	729.167	202.167	96.5	298.667	5	4.8	5	5	5	5	5	5	4	4	4	4	4	5	5	4	5	5	5	5	5	5	5	5	5	5	5	5	5	5	5	5	5	5	4	5	5
105	1	0	163.4	55.5	15	20.7869	3	9660.5	239.5	158.833	20.1667	179	1.33333	2.58571	1	1	1	2	1	2	3	3	3	3	2	3	3	3	3	3	3	3	3	3	3	3	3	3	2	2	2	3	2	3	2	2	1	2	2
106	1	0	173.5	69.3	14	23.0215	2	9255.17	672.5	114.5	36.8333	151.333	3	2.81905	3	3	3	3	3	3	3	3	2	2	2	3	3	3	3	3	2	3	3	3	3	4	3	3	3	3	3	3	3	3	3	1	1	3	3
107	1	0	173.2	69.8	15	23.268	2	9038.83	803.833	163.667	72.6667	236.333	4.5	3.51429	4	4	5	4	5	5	5	5	5	5	5	5	5	5	5	3	3	3	3	3	3	3	3	3	3	3	3	3	3	3	3	3	3	3	3
108	1	0	168.2	61.2	15	21.6321	1	9364.17	408.833	243	63	306	4.33333	3.58095	4	5	5	4	4	4	5	5	5	5	5	5	5	5	5	5	2	5	5	3	5	2	3	3	2	5	5	3	2	4	3	1	2	2	1
109	1	1	160.1	55.2	14	21.5356	2	8955.17	942.5	163.833	17.5	181.333	3.16667	2.97857	3	3	3	3	3	4	3	3	3	3	3	3	3	3	3	3	2	3	3	3	3	3	3	3	3	3	3	3	3	4	3	3	3	3	3
110	1	1	161.3	53.4	15	20.5245	1	8469.83	1393.83	149.5	65.8333	215.333	3	3.02857	3	3	3	3	3	3	3	4	3	3	3	3	3	3	3	3	3	3	3	3	3	3	3	3	3	3	3	3	3	3	3	3	3	3	3
111	1	1	163.7	88.5	14	33.0252	5	8898.83	1010.5	145	24.6667	169.667	3	2.90238	3	3	3	3	3	3	3	1	2	3	2	3	3	4	3	3	2	2	1	2	3	4	5	5	3	3	3	4	3	3	3	2	2	3	2
112	1	1	163.3	60	14	22.4998	2	9344.33	368.833	349.167	16.6667	365.833	5	3.6	5	5	5	5	5	5	5	3	3	3	3	4	4	4	4	4	4	5	5	3	4	4	4	4	4	4	4	4	4	4	4	2	3	1	1
113	1	0	172.2	72.6	15	24.4833	3	9080.17	720.167	217	61.6667	278.667	4	3.85238	4	4	4	4	4	4	4	3	4	3	2	3	5	4	4	4	5	4	4	3	4	5	5	5	4	4	3	4	4	3	3	3	3	4	4
114	1	0	173.1	77.7	15	25.9315	1	9191.17	564.833	303.333	19.6667	323	3.33333	3.85714	4	3	3	4	3	3	4	4	3	3	5	4	4	4	4	4	4	4	4	5	4	4	4	4	4	4	4	4	4	4	4	4	4	3	1
115	1	0	165.2	60.7	15	22.2417	3	8940.5	840.333	235.333	62.8333	298.167	3.33333	3.83095	3	4	4	3	4	2	3	3	2	3	3	5	5	5	5	5	4	4	4	5	3	4	4	4	4	4	3	4	4	4	3	3	3	4	4
116	1	0	172.1	85.1	15	28.7321	3	9619.5	206.333	164.5	88.6667	253.167	3.83333	3.91429	3	4	4	4	4	4	4	4	3	3	4	4	4	4	4	4	4	4	3	5	4	4	4	4	4	4	4	4	4	4	4	3	4	4	4
117	1	0	179.1	73	15	22.7579	1	8109	1585.83	230.667	153.5	384.167	5	4.8	5	5	5	5	5	5	5	5	5	5	5	5	5	5	5	5	5	5	5	5	5	5	5	5	5	5	5	5	5	5	5	4	3	3	4
118	1	1	161.2	57.3	14	22.0508	6	9422.83	547.667	87.5	21	108.5	3.33333	2.77143	3	3	3	4	3	4	3	2	3	3	2	3	3	3	3	4	3	4	3	3	3	2	4	2	2	2	3	3	3	3	3	2	1	3	3
119	1	1	153.8	63.5	14	26.8449	3	8743	1125	147.333	63.6667	211	2.83333	3.39048	3	3	3	3	3	2	4	3	3	5	2	5	5	5	5	5	3	3	3	3	3	3	3	3	4	3	3	3	3	3	3	3	3	3	3
120	1	1	154.7	40.8	14	17.0482	6	9482.67	388	192	16.3333	208.333	4	3.65952	4	4	4	4	4	4	2	2	2	3	4	3	4	3	3	4	3	4	4	4	4	4	4	4	3	4	4	4	4	4	3	4	5	4	5
121	1	1	160	54.7	14	21.3672	1	8624	1242.83	192	20.1667	212.167	3.5	3.97143	3	4	4	3	3	4	3	3	2	4	2	5	4	4	5	5	3	5	3	3	3	5	5	5	3	5	4	5	5	5	5	3	2	3	3
122	1	1	159.8	39.8	14	15.5858	3	9422.17	405.167	212	39.6667	251.667	3	2.97143	3	3	3	3	3	3	3	3	3	3	3	3	3	3	3	3	3	3	3	3	3	3	3	3	3	3	3	3	3	3	3	3	2	3	3
123	1	1	153.4	41.8	14	17.7634	2	9211.83	713.167	115.5	38.5	154	3.33333	3.6381	4	4	4	3	3	2	5	3	3	3	3	5	4	5	4	4	3	5	3	3	3	5	5	4	3	3	3	5	5	5	5	1	1	2	2
124	1	1	151.3	50.3	14	21.973	2	9657.67	220.167	161	40.1667	201.167	3.33333	3.6119	3	3	3	3	4	4	5	3	3	3	2	4	4	4	4	4	3	4	4	4	5	4	4	4	4	3	3	4	3	4	4	3	3	3	3
125	1	1	169	66	14	23.1084	6	9373.17	476.667	218	11.1667	229.167	2.83333	2.89524	3	3	3	3	2	3	4	2	3	2	2	4	4	4	4	4	3	4	2	2	3	3	3	3	3	3	2	3	3	3	3	3	1	3	3
126	1	1	170.2	67.5	14	23.3015	1	9447.83	441.667	172.167	17.3333	189.5	2.33333	2.90476	3	2	2	2	2	3	2	3	3	3	3	3	3	3	3	3	2	3	3	4	4	2	3	2	3	3	3	3	3	3	3	3	3	3	3
127	1	1	159.1	39.3	14	15.5257	1	9200.33	682.833	182.5	13.3333	195.833	3.16667	3.53333	3	3	3	4	3	3	3	3	3	3	4	4	5	3	4	4	4	3	4	4	5	4	3	3	5	4	3	3	3	3	3	3	4	3	3
128	1	1	160.2	48.6	15	18.937	1	9389.17	539.5	120.833	29.5	150.333	2.66667	2.97381	3	2	3	2	3	3	3	4	3	3	2	3	3	3	3	3	3	3	3	4	3	3	3	3	4	2	2	3	3	3	2	4	3	3	3
130	1	1	152.3	42.4	14	18.2796	6	9417.83	527	98	36.1667	134.167	2.5	2.96429	2	3	2	3	3	2	3	2	5	3	2	3	3	3	3	2	3	4	4	3	3	2	3	3	4	3	3	3	2	3	3	2	2	4	3
131	1	1	162.8	65.4	14	24.6757	2	9348.17	474.333	194.333	62.1667	256.5	3.33333	3.33571	3	3	4	3	4	3	2	5	5	5	4	4	4	4	4	4	3	4	4	4	5	1	3	2	4	4	4	4	2	2	3	3	2	3	3
132	1	1	168.6	64.5	14	22.6905	6	9189.67	677.5	191.5	20.3333	211.833	3.66667	3.80238	4	3	4	4	4	3	4	3	3	3	3	4	4	4	4	4	4	4	4	3	3	3	4	4	4	4	4	4	5	5	5	3	2	4	4
133	1	1	151.2	49	14	21.4335	6	8562.67	1109.17	322.333	84.8333	407.167	3	2.96429	3	3	3	3	3	3	3	3	3	3	3	3	3	3	3	3	3	3	3	3	3	3	3	3	3	3	3	3	2	3	3	3	3	3	3
134	1	1	152.7	43.5	14	18.6557	1	9473.33	404	184.333	17.3333	201.667	3	3.01905	3	3	3	3	3	3	4	4	3	3	4	3	3	3	3	3	3	3	3	3	3	3	3	3	3	4	3	3	3	3	3	3	2	2	2
135	1	1	158	53	14	21.2306	6	8713.83	1093.33	232.5	39.3333	271.833	3.5	3.1881	5	3	3	3	3	4	4	3	3	3	3	3	3	3	3	3	3	4	3	4	4	4	3	3	4	3	3	4	3	3	3	2	2	3	3
136	1	1	146.1	37.8	14	17.7089	1	9362.17	469.333	143.667	103.833	247.5	3.5	3.34286	3	4	3	4	4	3	4	4	3	3	4	4	4	3	3	3	3	4	4	4	4	3	3	3	3	3	3	3	3	3	3	4	2	4	4
137	1	1	164.9	63	14	23.1686	3	9075.33	780.833	182.167	40.6667	222.833	4.33333	4.08095	5	4	4	4	5	4	5	5	4	4	3	5	4	5	5	5	4	3	3	4	3	5	5	5	4	4	3	5	5	4	4	3	3	3	3
138	1	1	167.3	57.9	14	20.6865	1	9281.33	530.667	241.833	25.1667	267	3.33333	4.01905	3	3	3	3	4	4	4	4	4	4	4	4	4	4	4	4	4	4	4	4	4	4	4	4	4	4	5	4	4	4	4	4	3	4	4
139	1	1	165	52	15	19.1001	6	9349.5	548.5	153.333	27.6667	181	2.33333	2.78333	2	2	2	2	3	3	4	2	3	3	3	4	4	3	3	3	2	3	2	2	2	3	3	3	3	2	2	3	4	4	4	1	1	2	2
141	1	1	148.5	44.5	14	20.1793	3	8842.83	950.667	235.333	50.1667	285.5	4	4.14286	4	4	4	4	4	4	5	4	5	5	3	5	5	5	5	5	3	3	3	3	3	5	5	5	5	4	3	5	5	5	5	3	3	2	2
142	1	1	156.1	71.8	14	29.4658	2	8825	1060	159.667	34.3333	194	3.5	3.70238	3	2	4	4	4	4	4	4	4	3	4	3	3	3	3	3	4	4	4	5	4	3	4	4	4	4	4	3	3	4	3	4	4	4	4
143	1	1	151.4	43.4	14	18.9338	3	9312.5	449	276.5	41	317.5	4	3.64048	4	4	4	4	4	4	4	4	2	4	4	3	4	4	4	4	4	4	4	4	4	4	3	3	4	4	4	4	4	4	3	3	3	2	4
144	1	1	160	47.6	14	18.5938	1	9052.83	778.5	188.167	59.5	247.667	3.16667	3.3	4	3	1	3	4	4	4	3	3	4	3	4	4	4	4	4	4	4	4	4	4	3	3	3	3	3	3	3	4	4	3	1	1	3	3
145	1	1	154.7	58.4	14	24.4024	6	9064.33	817.167	171.667	25.8333	197.5	3.16667	3.13333	3	3	3	3	4	3	3	3	4	4	3	3	3	3	3	3	2	3	3	3	3	3	4	3	3	3	3	4	4	4	4	3	3	2	2
146	1	1	158.3	47.1	14	18.7957	6	9211.17	604.833	239.667	23.3333	263	3.66667	3.55952	3	4	4	4	3	4	2	3	2	3	3	4	4	4	4	4	4	4	4	4	4	4	4	4	3	3	2	4	4	4	5	4	4	3	3
147	1	1	161.9	62	14	23.6536	6	8906	994.167	142.167	36.6667	178.833	2.66667	3.00714	3	2	3	3	3	2	3	3	4	2	3	5	5	4	5	5	4	5	4	2	2	2	2	2	1	1	4	2	2	3	2	4	4	3	2
148	1	1	160.1	69.6	14	27.1535	2	8415.5	1266.83	305.833	90.8333	396.667	4.16667	3.52381	4	4	5	4	4	4	5	5	3	3	4	5	5	4	4	4	3	3	4	3	5	3	3	3	3	4	4	3	3	3	3	3	3	3	3
149	1	1	154.9	37.7	14	15.7123	6	9452.83	376.833	171	78.3333	249.333	3.33333	3.17143	3	3	4	4	3	3	3	3	4	3	3	4	4	4	4	3	4	4	3	3	3	3	3	3	3	3	3	3	3	3	3	2	3	3	3
150	1	1	152.1	47.2	14	20.4025	2	9631.33	309.333	129	9.33333	138.333	3.16667	3.47619	3	3	4	2	3	4	5	4	3	4	5	3	3	3	3	3	4	4	4	4	3	3	3	4	4	4	4	3	3	3	3	3	3	3	3
151	1	1	157.7	53	14	21.3114	1	9315	504	173.333	86.6667	260	3.33333	3.7619	3	4	3	3	4	3	5	4	3	3	4	5	5	4	3	3	3	3	3	3	4	4	4	4	3	5	5	4	4	4	4	3	3	3	3
152	1	1	148.2	47.2	14	21.4905	4	8977.17	862	181.833	58	239.833	3.66667	3.48333	4	3	3	4	4	4	2	2	3	3	2	4	4	4	4	4	3	3	3	4	4	5	5	4	4	4	3	4	5	4	4	2	2	2	2
153	1	1	160.4	39.6	14	15.3917	1	8717.83	1062	257.833	41.3333	299.167	4	3.9381	4	4	4	4	4	4	4	4	4	4	4	4	4	4	4	4	2	4	4	4	4	4	4	4	4	4	3	3	4	3	4	5	4	5	5
154	1	1	157.4	45	14	18.1636	2	9262.67	570.833	221	24.5	245.5	3.16667	2.98095	3	3	3	3	3	4	3	3	2	2	3	4	4	4	4	4	3	3	3	3	3	3	3	3	2	3	3	3	3	3	3	3	1	3	3
155	1	1	162.6	58.1	14	21.9753	1	9652	186.667	122	118.333	240.333	3.33333	4.13571	3	4	4	3	3	3	4	5	4	5	3	5	5	5	5	5	3	4	3	3	3	4	4	4	5	5	5	5	5	5	4	4	4	2	2
156	1	1	163.4	64.2	14	24.0453	6	9300.67	538.667	193.833	45.8333	239.667	3.33333	3.15238	2	3	4	4	2	5	4	3	3	4	2	5	5	5	5	5	1	3	5	3	4	3	3	2	3	3	3	4	4	4	4	1	1	1	1
157	1	0	154.2	59.8	13	25.1497	4	7885.17	1994	109.5	90.3333	199.833	3.16667	3.1	3	3	3	3	4	3	3	2	3	3	3	3	3	2	4	3	2	3	4	4	3	3	2	4	3	3	3	4	3	3	4	3	3	4	3
158	1	0	159	71	13	28.0843	4	9228	513.667	306.667	30.6667	337.333	4.5	3.76667	3	5	4	5	5	5	4	3	3	3	4	5	5	5	5	5	2	3	3	3	4	5	5	5	4	4	3	3	3	3	5	3	2	3	3
159	1	0	156	48.1	13	19.765	2	9508.83	375.833	121.5	72.8333	194.333	3	3.34286	3	3	3	3	3	3	5	5	3	3	5	3	3	3	3	4	3	3	3	3	3	3	3	3	5	5	5	3	3	3	3	1	1	3	3
160	1	0	154.1	65.1	12	27.4142	3	8442.83	1316.17	259.5	60.5	320	4.83333	3.92381	4	5	5	5	5	5	3	3	3	3	3	3	3	3	3	3	4	4	5	4	5	3	5	5	5	4	4	5	3	3	5	4	4	5	5
161	1	0	158.2	44.2	13	17.6608	2	8905.33	910.5	195.667	67.5	263.167	3.66667	3.47619	3	3	4	4	4	4	3	4	3	3	3	3	4	4	4	4	3	5	4	5	3	4	3	3	3	3	3	4	4	4	4	3	3	3	3
162	1	0	160.3	65.3	13	25.4124	3	8313.67	1540.17	151	74.1667	225.167	3	3.68571	3	3	3	3	3	3	4	3	3	3	3	4	4	5	4	4	5	5	4	3	5	4	4	3	4	3	3	4	4	4	4	3	3	3	3
163	1	0	151.4	52.4	12	22.8602	3	8736.83	1065	209.667	67.5	277.167	3.33333	3.34762	3	3	3	4	4	3	3	3	3	3	2	4	4	4	3	3	4	3	3	4	3	4	5	4	3	3	3	3	4	3	4	3	3	2	3
164	1	0	167.7	71.1	12	25.2815	2	8791.67	986.167	265	36.1667	301.167	3.5	3.66667	3	4	4	3	4	3	4	4	3	3	3	3	4	4	4	4	5	4	5	4	5	4	3	4	3	3	3	4	4	4	4	4	3	3	3
165	1	0	173.5	67.9	13	22.5565	3	8577	1239	202.667	60.3333	263	4.66667	4.69524	4	5	5	5	4	5	4	4	4	3	4	5	5	5	5	5	5	5	5	5	5	5	5	5	5	5	4	5	5	5	5	5	4	5	5
166	1	0	161.2	51	13	19.6264	1	9002.5	817.5	173.333	85.6667	259	3.66667	3.7381	4	4	3	4	4	3	5	5	4	4	5	3	3	4	4	4	4	5	5	3	5	3	4	4	4	4	4	4	3	4	3	3	1	3	3
167	1	0	147.7	54.6	13	25.0283	3	8961.83	861.833	209.167	46.1667	255.333	3.33333	3.04762	3	3	4	3	3	4	4	2	3	3	3	3	3	3	3	3	2	4	4	2	3	2	4	4	3	3	3	3	3	3	3	3	3	3	3
168	1	0	158.9	60.5	13	23.9611	2	8638	1113.67	216.167	111.167	327.333	4	3.85714	4	4	4	4	4	4	4	4	4	4	4	4	4	4	4	4	4	4	4	4	4	4	4	4	4	4	4	4	4	4	4	3	3	3	3
169	1	0	153.1	39.8	13	16.9798	2	8193.17	1560.17	213.833	111.833	325.667	4.16667	4.97143	3	5	4	4	4	5	5	5	5	5	5	5	5	5	5	5	5	5	5	5	5	5	5	5	5	5	5	5	5	5	5	4	5	5	5
170	1	0	157.2	56.1	13	22.7017	2	8395.5	1318.17	231.833	133.5	365.333	4.33333	4.47619	5	4	5	4	4	4	5	4	4	4	5	5	5	4	5	5	4	4	4	4	5	5	4	4	5	5	5	5	5	5	5	4	5	3	3
171	1	0	164	57.1	12	21.2299	2	8140	1640.17	174.833	124	298.833	4	4.19048	4	4	4	4	4	4	5	5	4	4	4	5	5	5	4	4	4	3	3	4	4	5	5	5	4	5	4	5	5	5	5	3	3	1	1
172	1	0	160.2	45.5	12	17.7291	1	8277	1437.17	207.167	157.667	364.833	5	4.14762	5	5	5	5	5	5	5	4	2	3	5	4	5	5	5	5	3	4	4	3	3	5	5	5	4	4	5	4	4	5	5	4	4	3	3
173	1	0	166.3	85.6	14	30.952	4	8484.67	1332	175.833	86.5	262.333	3.66667	3.32381	4	4	4	4	3	3	2	1	2	3	1	4	4	4	4	3	3	3	3	2	3	5	5	4	3	3	3	4	4	4	4	3	4	3	3
174	1	0	158	47.6	14	19.0675	2	8794.17	784	409.167	91.6667	500.833	4.66667	4.56429	4	4	5	5	5	5	5	5	3	3	5	5	5	5	5	5	2	3	3	5	3	5	5	5	5	5	5	4	5	5	5	5	5	5	5
175	1	0	153.7	40.9	14	17.3131	2	8240.17	1610.33	184.5	44	228.5	3.33333	3.60952	4	3	4	3	3	3	4	4	2	3	5	4	4	4	3	4	4	4	4	3	4	4	4	4	3	4	4	4	4	4	4	2	2	3	2
176	1	0	168.3	55.3	14	19.5235	3	8520.67	1270.17	126.667	161.5	288.167	4	3.81667	5	4	3	4	4	4	5	4	3	3	4	4	5	4	4	5	3	3	3	3	4	4	5	5	4	4	4	4	3	3	3	4	4	3	3
177	1	0	169.7	87	14	30.2103	4	9076.5	724.667	254.333	23.5	277.833	3.83333	3.13095	4	3	4	4	4	4	2	2	2	2	3	4	4	4	4	4	2	3	3	2	3	4	4	4	2	3	3	3	3	3	4	4	4	3	3
178	1	0	165.4	60.5	13	22.1149	2	8433.83	1390.33	139.333	115.5	254.833	3.66667	3.77143	4	4	3	4	4	3	4	4	5	4	4	4	4	3	4	3	3	3	4	3	3	4	4	4	4	4	4	4	4	4	4	3	4	4	3
179	1	0	181.1	101.7	14	31.0087	2	8447.33	1420.17	103.833	107.667	211.5	3.83333	3.54286	4	4	4	5	3	3	4	3	4	4	4	4	4	4	4	4	3	3	3	3	4	3	4	3	3	4	4	4	4	4	4	3	2	3	3
180	1	0	156.9	55.4	14	22.5042	2	8881.83	946	140.167	111	251.167	3	3.47381	3	3	3	3	3	3	3	3	2	3	3	3	3	3	3	3	3	4	3	3	4	5	5	5	3	4	4	3	4	3	3	3	3	4	3
181	1	0	164.2	70.9	14	26.2966	2	8044.83	1717.5	174.5	142.167	316.667	4.5	3.65952	4	4	5	5	5	4	4	3	2	2	4	5	5	4	5	4	2	3	4	2	4	4	4	3	4	3	2	4	5	5	5	3	4	3	4
182	1	0	169.2	57.2	14	19.98	4	8679	1176.5	154	69.5	223.5	3.16667	3.41429	4	4	3	3	2	3	5	3	3	3	5	3	3	3	3	3	5	3	3	4	3	3	5	4	3	3	3	3	3	3	5	3	3	3	3
183	1	0	180.8	75.8	14	23.1885	3	8530.33	1313.5	123.5	111.667	235.167	3.16667	3.60952	3	3	4	3	3	3	4	3	4	4	3	4	4	4	4	3	4	5	4	4	4	4	3	4	3	3	3	4	4	4	4	3	2	3	3
185	1	0	157.3	85.3	14	34.474	4	8334.83	1426.67	276.833	40.6667	317.5	4.66667	4.09524	5	5	4	5	5	4	2	2	2	3	3	5	5	5	5	5	3	5	5	5	5	5	5	5	3	5	3	5	5	5	5	3	3	3	3
186	1	0	169.1	52.6	14	18.3949	1	8909.17	952.667	124.667	92.5	217.167	3.83333	4.10476	4	4	4	3	4	4	5	5	4	4	4	4	4	4	4	4	5	5	4	5	4	4	5	4	4	4	4	4	4	4	4	4	4	3	3
187	1	0	167.7	69.3	15	24.6415	2	8268	1542.67	201.833	66.5	268.333	3.5	4.26667	3	4	4	3	4	3	4	4	3	3	4	4	5	4	4	4	5	5	4	5	4	5	5	5	4	5	5	4	4	4	4	4	3	4	4
188	1	0	161.8	60.1	13	22.9571	1	8845	1020.67	106	107.333	213.333	3.33333	3.4881	3	3	3	3	4	4	5	5	4	3	5	4	4	4	4	3	3	4	3	2	4	4	3	4	4	4	4	5	4	3	3	2	3	1	1
189	1	0	170.8	96.1	15	32.9418	3	8262.83	1479.17	226	111	337	4.66667	3.95238	5	5	5	5	5	3	5	2	3	3	2	5	5	5	5	5	3	5	4	4	4	5	5	5	3	2	3	5	5	5	5	3	2	3	3
190	1	0	167.3	58.1	15	20.7579	1	8477.67	1133.17	301.5	166.667	468.167	4.83333	4.47619	5	4	5	5	5	5	5	5	3	5	5	5	4	5	5	5	3	5	5	5	5	4	5	5	4	5	5	5	5	5	5	3	3	3	3
191	1	0	172.2	81.1	15	27.3498	3	9318.83	534.167	116.833	109.167	226	3.16667	2.97143	3	4	3	3	3	3	3	3	2	1	3	3	3	3	3	3	4	4	3	3	4	3	3	3	3	3	3	3	3	3	3	3	2	3	3
192	1	0	173	62	15	20.7157	1	8912.33	960	163.833	42.8333	206.667	3.16667	3.00952	3	3	3	3	4	3	4	4	3	3	4	3	3	4	3	3	3	3	2	2	2	2	3	3	4	4	4	3	3	3	3	3	2	2	2
193	1	0	168.7	78.6	14	27.618	1	8185.67	1406.67	319.167	167.5	486.667	4.16667	4.45952	5	4	4	4	4	4	4	4	2	5	5	5	5	5	4	5	3	3	3	4	4	5	5	5	4	5	5	5	5	4	5	4	4	5	5
194	1	0	173.7	56.3	15	18.6599	1	9017.5	771.333	191.833	98.3333	290.167	4	3.38571	4	4	4	4	4	4	4	4	3	4	4	3	3	3	3	4	3	5	4	3	3	4	4	4	3	3	3	3	3	4	4	3	3	2	3
195	1	0	152.2	47.2	14	20.3757	1	9171.5	552.5	305.5	49.5	355	4	4.17143	4	4	4	5	4	3	5	4	5	4	4	5	5	5	5	5	4	5	5	3	5	4	3	3	5	5	4	4	4	4	4	4	2	3	3
196	1	0	165.5	53.7	15	19.6055	2	8704.67	973.833	345.5	55	400.5	4.83333	4.37143	5	5	5	5	4	5	5	4	4	5	4	5	5	5	5	5	5	5	5	5	3	5	5	5	5	5	5	5	5	3	3	3	3	3	3
197	1	0	162	51.5	13	19.6235	3	8223.5	1604.17	146.333	105	251.333	4.33333	3.65952	4	4	5	4	5	4	3	3	3	4	3	4	4	4	4	4	3	3	3	3	3	4	5	4	3	4	3	4	5	5	5	2	3	4	3
200	1	0	167.7	71.4	13	25.3882	4	8334.5	1470.17	227.667	46.6667	274.333	3.5	3.58095	4	3	3	3	4	4	3	2	2	4	4	4	4	4	4	4	2	4	4	4	4	5	5	3	3	2	2	5	5	5	5	1	3	1	4
201	1	1	154.4	49.5	12	20.764	1	9089	642.667	264.5	82.8333	347.333	4.66667	4.25714	5	5	4	5	5	4	5	5	5	4	5	4	5	4	4	5	3	4	4	5	5	4	5	4	4	5	5	4	4	4	4	4	3	3	4
203	1	1	152.8	33.4	13	14.3054	2	8504.33	1407.5	73.3333	93.8333	167.167	2.5	3.68095	2	3	3	3	2	2	5	5	5	5	5	3	3	3	3	3	4	3	3	5	4	5	1	3	4	5	5	4	3	3	4	3	3	2	3
205	1	0	167.3	61.2	13	21.8655	1	9159.33	635.667	227	57	284	3	3.66905	3	3	3	2	4	3	4	4	5	4	5	4	4	3	3	4	3	4	3	2	3	3	3	3	4	4	5	4	4	3	4	3	4	4	4
206	1	0	149.5	54.4	12	24.3398	4	8920.83	830	252	76.1667	328.167	3.83333	4.22143	5	3	5	5	3	2	3	3	3	4	4	4	4	4	5	5	4	4	4	4	5	5	5	5	4	4	4	4	3	4	4	4	5	5	5
207	1	1	151.4	41.5	12	18.1049	1	9135.17	663.167	229	51.6667	280.667	3.83333	3.68571	4	3	4	4	4	4	3	3	4	4	2	4	4	4	4	4	3	4	4	4	4	4	4	4	3	3	3	4	4	4	4	3	4	4	4
208	1	1	158.6	55.5	12	22.0641	2	9021	712.167	325.667	20.1667	345.833	4.66667	4.62857	5	5	5	5	4	4	5	5	4	4	5	5	5	5	5	5	5	5	5	4	5	5	5	5	5	5	5	5	5	5	5	3	3	3	3
209	1	1	156.6	53.4	13	21.775	1	9118.83	716.833	157.333	86	243.333	3.83333	3.54524	4	4	4	4	4	3	4	4	3	3	4	3	3	3	3	3	3	2	2	3	4	5	5	5	3	4	4	4	4	3	4	3	3	3	3
210	1	1	157.2	46.2	13	18.6955	2	8770	1146.67	141.667	20.6667	162.333	1.33333	2.42857	2	1	1	1	1	2	2	2	3	3	3	3	3	3	3	3	3	2	2	2	2	2	2	2	3	3	3	3	3	3	3	1	2	1	1
213	1	0	162.2	44.5	13	16.9145	1	8774	942.667	240.833	121.5	362.333	4.16667	4.37143	5	4	4	4	4	4	4	4	5	4	5	4	4	4	4	3	3	3	3	1	5	5	5	5	5	5	5	5	5	5	5	5	5	4	4
214	1	1	164	82	12	30.4878	6	8695.17	1227.33	110.5	46	156.5	2.66667	2.82381	3	3	2	3	2	3	3	2	1	1	2	4	5	5	4	4	2	3	4	4	4	2	2	2	4	3	4	2	2	3	3	2	2	1	3
215	1	0	162.9	57.6	13	21.706	6	8989.33	775.333	148.333	166	314.333	4.16667	3.83333	4	4	5	5	4	3	5	5	3	3	5	4	4	4	4	4	3	5	3	5	4	3	4	4	5	5	4	3	4	4	3	3	3	4	3
216	1	1	162.2	47.9	13	18.2068	3	9021.17	902.5	93.1667	62.1667	155.333	1.66667	3.43333	1	2	2	1	2	2	4	3	4	3	4	4	4	3	4	4	3	3	3	4	3	4	3	3	3	3	3	4	3	4	3	3	3	4	4
219	1	0	169	61.3	12	21.4628	6	8629.17	1089.17	194	166.667	360.667	4.83333	4.53333	5	4	5	5	5	5	4	4	4	5	4	4	3	4	4	5	4	5	5	5	5	5	5	5	4	4	5	5	5	5	5	5	5	4	4
220	1	1	162.3	55.1	13	20.9177	1	8812.83	1045.33	147.167	73.6667	220.833	3.33333	3.52857	3	4	4	3	3	3	5	5	4	3	3	3	4	4	3	3	4	4	4	4	4	4	4	4	3	3	3	3	3	4	4	3	2	3	3
221	1	1	160.7	46.9	13	18.1611	2	8967	857.167	178.167	76.6667	254.833	4.16667	4.10238	4	4	4	5	4	4	3	3	4	4	4	5	5	5	5	5	3	3	2	4	4	5	5	5	5	5	4	5	4	4	4	4	2	3	3
222	1	1	162.9	53.4	12	20.1233	2	9124.17	850.5	84.3333	20	104.333	2.33333	3.40714	2	2	3	3	2	2	4	2	2	3	4	3	4	2	4	4	4	4	3	3	4	3	3	3	3	3	3	4	3	3	3	4	4	5	5
223	1	1	157.7	42.6	13	17.1296	1	8713.5	1182.33	106.333	76.8333	183.167	3.33333	3.15714	4	3	4	3	3	3	4	4	3	1	4	3	3	3	3	3	2	2	2	4	4	3	4	3	3	4	4	3	4	3	4	3	3	2	2
226	1	1	159.9	47.7	13	18.6561	6	9392.5	561.333	90.3333	34.8333	125.167	3	2.65714	3	3	3	3	3	3	4	2	3	2	3	2	3	3	2	2	2	2	2	1	1	3	3	3	3	3	3	3	3	3	3	3	2	3	3
228	1	1	159.9	50.3	13	19.673	2	9267.33	610.167	168.667	32.8333	201.5	2.33333	3.26905	2	2	2	2	3	3	4	4	3	3	4	5	4	4	4	4	3	3	4	4	3	3	3	2	3	4	4	3	2	3	3	2	2	3	3
229	1	1	157.2	56.6	15	22.904	2	9044.67	850	111.5	72.8333	184.333	2.16667	3.26667	2	2	2	3	2	2	4	3	2	2	4	4	4	4	4	3	2	2	3	2	3	4	3	5	3	4	4	4	4	4	4	2	2	2	3
231	1	0	161.5	61.6	13	23.6176	1	8572.83	1160.5	289.167	56.5	345.667	4.83333	4.4381	4	5	5	5	5	5	5	5	5	5	5	5	5	5	5	5	5	5	5	4	5	5	5	5	4	5	5	5	5	5	5	3	2	1	1
233	1	0	157.2	44	13	17.8052	1	8563.17	1282.83	113.167	119.833	233	3.83333	4.48571	4	4	4	4	3	4	5	5	4	4	5	5	5	5	5	5	3	5	5	5	5	5	5	5	5	5	5	5	5	5	5	4	4	1	1
238	2	0	171	67	16	22.913	2	9172.33	672.67	172.5	61.5	234	3.33333	3.46667	3	3	3	4	4	3	4	4	3	4	2	4	4	3	4	4	4	3	3	4	4	4	4	4	3	4	4	4	4	4	4	4	2	1	1
239	2	0	173	82	17	27.3982	3	8914.5	940	189.33	35.17	224.5	3.16667	3.15238	3	3	4	3	3	3	3	3	3	3	3	4	4	3	3	3	2	3	5	4	2	3	3	3	3	5	3	3	3	3	3	3	2	3	3
240	2	0	162	49	16	18.6709	3	9609.67	283.5	110.33	75.5	185.83	4.83333	3.55	5	5	5	5	5	4	3	3	3	3	2	4	4	4	4	4	4	5	4	5	5	4	4	4	4	2	3	3	3	3	4	3	4	3	3
241	2	0	164	75	17	27.8852	3	8709.16	1101.17	172	96.67	268.67	4.16667	3.9381	4	4	4	4	5	4	3	3	3	3	3	5	5	5	5	4	4	5	4	5	4	4	5	4	4	3	3	5	4	5	4	3	3	4	3
242	2	0	175	93	16	30.3673	4	9301.33	439.17	266	72.5	338.5	4	3.59762	4	4	4	4	4	4	2	2	2	2	3	5	4	4	4	4	3	4	4	5	4	4	4	4	3	3	4	4	5	4	4	4	4	3	3
243	2	0	172	70	17	23.6614	2	9051.33	808	172.34	47.33	219.67	4	3.8	4	4	4	4	4	4	4	4	4	4	4	3	3	4	3	3	3	4	3	4	3	5	5	5	4	4	4	5	5	5	5	1	2	1	3
244	2	0	173	64	17	21.3839	1	9112.5	631.83	156.67	178	334.67	4.83333	5	4	5	5	5	5	5	5	5	5	5	5	5	5	5	5	5	5	5	5	5	5	5	5	5	5	5	5	5	5	5	5	5	5	5	5
245	2	0	174	72	17	23.7812	1	9213	555.83	191.34	118.83	310.17	5	4.42143	5	5	5	5	5	5	4	4	4	4	4	4	4	4	5	4	5	5	4	5	4	5	5	4	5	4	4	5	5	5	4	4	4	5	4
246	2	0	172	66	16	22.3094	1	9087.83	707.17	210.83	73.17	284	2.83333	3.56429	2	3	3	3	3	3	3	5	5	5	5	5	5	5	5	5	3	5	3	4	4	2	4	3	3	1	2	3	4	4	4	3	2	1	4
248	2	0	175	51	16	16.6531	1	8530.5	1177.5	235.17	135.83	371	4.16667	3.85714	4	4	4	4	4	5	4	4	2	5	4	5	5	5	5	5	4	4	4	4	4	4	4	4	4	4	4	5	5	5	5	1	2	1	1
249	2	0	166	60	16	21.7738	2	9087.83	861	78.84	51.33	130.17	2.33333	3.35476	3	2	2	2	2	3	4	4	3	3	3	4	4	3	4	4	4	4	4	4	4	4	4	4	2	2	3	4	4	4	3	3	2	2	2
250	2	0	176	77	17	24.858	2	9255.5	613.83	124.17	85.5	209.67	3.33333	4.30238	3	3	3	3	4	4	5	4	4	5	4	5	5	5	5	5	4	5	4	5	5	4	4	4	5	4	5	5	4	4	4	4	3	3	3
251	2	0	180	85	16	26.2346	4	9136.5	730.83	156.34	55.33	211.67	3.16667	3.18095	3	3	3	3	3	4	4	3	2	3	2	3	3	3	3	3	3	3	3	3	3	4	4	3	3	3	3	4	4	4	4	3	2	3	3
252	2	0	181	57	16	17.3987	2	8652.66	1135.67	242.34	48.33	290.67	3.83333	3.68571	4	3	4	4	4	4	3	3	3	3	1	5	5	4	5	5	3	3	3	5	4	4	4	4	5	3	4	4	4	4	4	3	2	4	4
254	2	0	174	63	16	20.8086	2	9235.16	604.67	169.84	69.33	239.17	3.33333	3.7619	4	3	3	3	3	4	4	4	4	4	4	4	4	4	4	4	4	4	4	4	4	3	4	3	4	4	4	4	4	4	4	3	3	3	3
255	2	0	177	69	17	22.0243	2	9227	640.17	136.83	75	211.83	3	3.87857	4	3	3	3	3	2	4	4	4	5	5	5	5	4	4	4	4	4	4	3	5	4	4	4	4	4	4	4	4	4	3	3	3	2	2
256	2	0	181	89	17	27.1664	2	9031.83	858.67	173.17	15.33	188.5	3.33333	3.12143	3	3	3	4	3	4	3	3	3	3	2	3	4	3	3	3	3	4	3	3	4	4	3	4	4	3	3	3	3	4	3	2	2	2	2
257	2	0	179	50	16	15.605	1	9066.5	731.5	231	50	281	3.16667	3.87381	3	3	4	3	3	3	3	4	5	5	4	4	4	3	4	4	3	4	4	3	4	4	4	4	3	4	4	3	3	4	3	4	4	5	5
258	2	0	172	86	17	29.0698	3	9389.67	522.83	147.83	18.67	166.5	2.66667	2.93333	3	3	2	3	2	3	3	2	2	2	2	3	3	3	3	3	3	4	4	4	4	3	3	3	3	4	3	3	3	3	3	3	2	2	2
259	2	0	174	71	16	23.4509	1	8351.83	1332	284.17	111	395.17	3.66667	4.2381	3	5	3	4	5	2	5	4	4	5	4	5	5	4	4	4	4	4	4	3	5	4	5	5	4	4	4	5	5	5	5	4	3	3	3
260	2	0	197	144	17	37.1048	3	9077	806.17	110.16	85.67	195.83	3.5	3.02857	3	3	4	3	4	4	3	3	2	2	2	3	4	4	4	4	3	4	3	3	3	3	3	3	3	3	3	3	3	3	3	3	2	3	3
261	2	0	182	104	17	31.3972	3	8563.33	1180	281.67	54	335.67	4.5	3.53333	5	5	5	3	5	4	4	2	2	4	4	5	5	4	5	5	4	4	4	4	4	5	5	5	2	3	2	4	4	4	4	2	2	1	1
262	2	0	167	80	16	28.6851	3	9184.66	582.67	224	87.67	311.67	4.5	4.00952	4	4	5	5	5	4	3	3	2	2	3	5	5	5	5	5	4	4	4	5	5	5	5	5	4	3	4	5	5	5	5	3	3	2	2
263	2	0	176	61	17	19.6927	1	8858.17	822.83	235.17	162.83	398	3.33333	4.00238	3	3	3	3	4	4	4	4	4	4	5	5	5	4	4	4	5	5	4	5	4	3	4	4	3	4	5	4	3	4	4	3	2	4	4
264	2	0	174	84	17	27.7447	3	9093.5	607.67	228.5	149.33	377.83	4	3.88571	4	4	4	4	4	4	3	2	3	3	4	5	5	4	4	4	4	4	4	4	4	4	4	4	4	4	4	4	4	4	4	4	3	4	4
265	2	0	156	49	18	20.1348	3	9244.17	555	181.66	98.17	279.83	4.5	3.27619	5	4	5	4	5	4	4	4	3	3	2	4	4	5	5	4	3	4	4	3	3	3	4	3	3	3	3	3	3	3	3	3	1	3	3
266	2	0	164	55	16	20.4491	1	9064.33	739.17	184	91.5	275.5	4	4.1881	4	5	4	3	4	4	5	4	4	2	4	5	5	5	5	5	4	4	4	5	5	5	5	5	4	5	5	3	3	3	4	4	3	3	3
267	2	0	167	84	16	30.1194	3	9501.34	381.33	182.33	14	196.33	2.66667	2.91905	3	3	2	3	2	3	3	3	1	2	3	3	3	4	4	3	4	3	2	3	4	4	3	4	2	3	3	3	2	3	2	3	2	3	3
269	2	0	174	103	18	34.0203	3	9244	609.83	99.67	125.5	225.17	5	3.42857	5	5	5	5	5	5	3	3	3	3	3	5	4	5	3	4	4	3	4	4	4	4	4	4	3	3	3	3	3	3	3	3	2	3	3
270	2	0	173	61	17	20.3816	1	9139.17	639	249.83	51	300.83	4.5	4.43333	5	5	4	4	4	5	5	4	5	5	4	5	5	5	5	5	4	4	5	5	4	5	5	5	3	5	5	4	4	5	5	4	3	3	3
271	2	1	163.8	63.4	16	23.6299	1	9413.84	474.33	122	68.83	190.83	2.66667	2.95714	2	3	3	2	3	3	5	5	4	4	5	2	2	2	2	4	4	4	2	2	4	2	4	2	2	4	4	2	4	2	2	2	2	2	2
272	2	1	169.1	67.4	17	23.5707	2	8411.5	1313.83	319.67	34	353.67	4.66667	4.60952	5	5	5	5	4	4	5	4	4	4	5	5	5	5	5	5	4	4	5	4	4	5	5	5	4	5	5	5	5	5	5	4	4	4	4
273	2	1	162.4	57	17	21.6124	3	8902.84	936.33	199.5	40.33	239.83	3.16667	2.97143	1	3	4	4	3	4	2	2	2	2	2	4	4	4	4	4	2	4	2	2	4	4	4	4	2	2	2	4	4	4	4	2	2	2	2
274	2	1	162.7	55.6	18	21.0039	2	8961.17	887.83	115.17	114.83	230	5	4.25714	5	5	5	5	5	5	3	3	2	2	3	5	5	5	5	5	2	2	5	5	5	5	5	5	5	5	5	5	5	5	5	5	3	5	2
275	2	1	159.3	63.1	17	24.8655	4	8809.16	1101.17	152	16.67	168.67	1.83333	2.52381	2	2	2	1	2	2	2	2	2	2	4	4	4	2	2	2	2	4	2	2	2	2	2	2	2	4	2	4	4	4	4	2	2	1	1
276	2	1	163.1	61	16	22.9309	2	9064.66	904.67	79.84	29.83	109.67	1.33333	2.31429	1	1	1	2	2	1	2	2	2	2	2	4	4	4	4	4	2	2	2	2	2	2	2	2	2	2	2	2	2	2	2	2	4	2	2
277	2	1	161.9	67.1	17	25.5993	2	8751.17	1140.33	169.67	17.83	187.5	2.66667	2.62381	3	3	3	2	3	2	2	2	2	2	2	2	2	2	2	2	2	4	4	4	2	2	4	2	2	2	2	4	2	4	4	2	4	5	2
278	2	1	167.7	49.9	16	17.7433	3	9510.17	399.33	154	15.5	169.5	2.5	2.69524	2	2	3	2	3	3	2	2	2	4	2	2	2	4	2	4	5	4	2	4	5	2	2	2	5	4	2	2	2	2	2	2	2	2	2
279	2	1	156.2	60.4	16	24.7557	2	8709.5	1167.5	107.5	94.5	202	4	4.39286	4	4	4	4	4	4	4	4	4	2	4	5	5	5	5	5	4	5	4	4	4	5	5	5	4	4	4	5	4	5	5	5	4	4	4
280	2	1	171.5	52.2	16	17.7477	3	9399.66	487.67	160.34	31.33	191.67	3.5	2.95238	4	3	4	4	3	3	2	4	5	5	4	5	5	5	5	4	2	4	2	2	4	4	2	2	2	2	2	2	2	2	2	2	2	2	4
281	2	1	169.2	53.5	17	18.6876	5	9501.17	459.5	94.16	24.17	118.33	2	2.08571	2	2	2	2	2	2	2	2	2	2	2	2	2	2	2	2	4	2	2	2	2	2	2	2	2	2	2	2	2	2	2	4	2	2	2
282	2	1	161.8	51.6	18	19.7103	4	8830.84	1098.83	93.16	56.17	149.33	2.83333	3.35238	3	3	3	3	3	2	2	2	4	4	2	4	4	2	4	4	2	4	4	5	5	5	5	5	4	2	2	4	4	4	4	2	2	1	1
283	2	1	164.5	68.7	16	25.3878	4	9316.17	593.5	103.16	66.17	169.33	2	2.55238	2	2	2	2	2	2	2	2	2	2	2	2	2	2	2	2	2	4	2	2	2	4	4	4	4	2	2	2	2	2	2	2	2	2	4
284	2	1	163.9	76.2	17	28.3659	1	8899.5	965.67	129	84.83	213.83	3	3.14286	4	1	4	2	3	4	4	5	2	2	5	4	4	4	4	4	2	2	2	2	2	4	2	2	2	4	4	4	4	4	4	2	4	2	2
285	2	1	167	57.6	18	20.6533	1	8630.66	1266.67	147.34	34.33	181.67	2.66667	2.58571	3	2	3	3	3	2	2	5	2	4	5	2	2	2	2	2	2	2	2	2	2	2	2	2	2	5	5	2	2	4	2	2	2	2	2
286	2	1	166.8	48	17	17.2524	4	9205	710.17	133.5	30.33	163.83	2.33333	3.2881	1	3	3	3	1	3	5	4	5	5	3	5	5	5	5	5	2	2	2	2	2	4	5	5	2	2	2	4	4	4	3	2	1	1	1
287	2	1	155.5	48.9	17	20.2231	2	9086.16	671.67	215.67	105.5	321.17	2.66667	3.64286	1	3	3	3	3	3	4	3	4	5	2	4	4	4	5	5	4	5	5	2	2	5	5	4	4	4	2	4	5	4	5	2	2	1	1
288	2	1	162.9	64.3	16	24.2309	3	9120	837.17	94.83	27	121.83	2.33333	2.28571	2	3	2	2	3	2	2	2	2	2	2	4	4	4	4	4	2	2	2	2	2	2	2	2	2	2	2	2	2	2	2	2	2	2	2
289	2	1	159.1	49.2	16	19.4368	1	9288.5	514.83	232.34	43.33	275.67	3.5	3.33333	4	3	3	4	4	3	4	4	2	2	2	4	4	4	4	4	2	2	4	4	4	4	4	4	2	4	4	4	4	4	4	2	2	2	2
290	2	1	154.7	56.7	17	23.692	3	9085.67	817.5	154.5	21.33	175.83	1.83333	2.52857	2	2	1	1	2	3	4	4	2	2	2	4	4	2	4	4	2	2	2	2	2	2	2	2	2	2	2	4	4	4	2	1	3	2	1
291	2	1	169	71	17	24.8591	3	8993.33	866.67	106.5	112.5	219	3.33333	3.50952	3	3	4	3	4	3	4	2	2	2	4	4	4	5	4	4	2	4	4	4	4	5	5	5	2	4	2	4	4	2	4	4	4	2	2
292	2	1	152.1	55.1	17	23.8173	1	9303.17	643.5	120	12.33	132.33	1.83333	2.4	2	2	1	2	2	2	4	2	2	2	2	2	2	4	2	2	2	2	2	2	2	2	2	2	2	2	2	4	4	4	4	2	2	2	2
293	2	1	163	58.2	17	21.9052	4	9166.34	609.33	193.66	109.67	303.33	4.16667	4.3381	4	4	4	4	4	5	4	3	4	4	3	5	5	5	5	5	4	5	5	5	4	5	5	5	5	5	4	5	4	4	5	4	2	2	2
294	2	1	165.7	58.6	18	21.3429	2	9304.66	594.67	100.5	79.17	179.67	1.83333	2.47619	2	2	2	2	2	1	2	2	2	2	4	2	2	2	2	2	2	4	4	4	4	2	2	2	2	4	4	2	2	2	2	2	2	2	2
295	2	1	154.1	54	16	22.7399	3	8778.84	1018.33	199.5	82.33	281.83	4	3.9	3	3	5	5	4	4	4	2	2	4	2	5	5	5	5	5	2	5	5	5	5	4	4	4	2	2	2	4	5	4	5	5	3	5	5
296	2	1	168.8	48.8	18	17.1267	2	9188.33	641.5	222.17	27	249.17	3.5	3.13333	3	4	4	3	4	3	2	3	3	2	2	4	4	4	4	4	2	2	2	2	4	4	4	4	2	4	4	4	4	4	4	2	1	2	2
297	2	1	153.2	43.5	17	18.5341	4	9733.33	211	118.34	16.33	134.67	1.66667	2.17143	2	1	2	2	2	1	2	2	2	2	2	2	2	2	2	2	4	2	2	4	4	2	2	2	2	2	2	2	2	2	2	2	2	2	2
298	2	1	159.2	54.7	16	21.5825	3	9323.5	515.17	159	81.33	240.33	2.83333	2.95238	3	3	3	3	2	3	2	2	2	2	2	4	4	2	4	4	2	2	2	4	2	5	5	5	4	2	2	2	4	2	4	2	2	2	2
299	2	1	167.1	79.4	16	28.4359	3	9327.83	601	136.17	14	150.17	2.16667	2.49048	2	3	2	2	2	2	2	2	2	2	2	2	2	2	2	2	2	2	2	2	2	4	4	2	4	4	4	4	2	2	2	1	2	1	2
300	2	1	161.3	58.6	15	22.5231	1	9022.67	791.83	162	102.5	264.5	5	3.89524	5	5	5	5	5	5	4	3	2	2	4	5	5	4	5	5	2	4	4	4	4	5	5	5	4	5	5	4	4	4	4	3	2	2	2
301	2	1	167.1	76.6	16	27.4332	3	9129.33	810.5	110.84	28.33	139.17	2.33333	2.53333	3	2	2	3	2	2	2	2	2	2	4	4	4	2	2	2	2	4	2	4	2	2	2	2	2	4	4	2	2	2	2	2	4	2	2
302	2	1	160.7	48.1	17	18.6257	3	9250.66	711.67	96	20.67	116.67	1.33333	2.15238	1	1	2	2	1	1	2	2	2	2	2	4	4	4	4	2	1	2	2	2	2	2	2	2	1	2	2	2	2	2	2	2	2	2	2
304	2	1	162.8	63.6	16	23.9965	3	8706.84	1099.83	261.33	11	272.33	3.66667	3.42381	4	3	4	4	3	4	4	4	4	2	4	4	4	4	5	2	2	2	2	4	4	4	4	2	4	4	2	2	4	4	4	4	4	2	4
305	2	1	158.9	41.3	17	16.3569	2	9070.84	774.33	179.83	54	233.83	3	2.80952	5	3	3	3	3	1	2	2	2	2	2	4	4	4	4	4	4	4	4	4	5	2	2	2	4	2	2	2	2	2	2	4	2	4	2
306	2	1	159.5	50.6	16	19.8897	3	9184.16	749.17	124.34	21.33	145.67	2.16667	2.47619	2	2	2	2	3	2	4	2	2	2	2	4	2	4	4	4	2	2	2	2	2	2	2	2	2	4	4	2	2	2	2	2	2	2	2
307	2	1	160.3	53.8	17	20.937	2	9406.34	472.83	171.83	28	199.83	2.83333	3.12381	3	2	3	3	3	3	4	4	2	2	2	4	4	4	4	4	2	2	2	2	2	4	2	2	5	5	5	4	4	4	4	2	2	1	1
308	2	0	175.4	54.3	17	17.6498	6	9325.34	608.83	117.33	27.5	144.83	2.5	2.55714	2	2	3	3	2	3	3	2	2	2	3	3	4	2	3	2	2	3	2	2	4	2	3	2	3	3	2	3	3	4	4	3	2	1	1
309	2	1	165.2	68.7	16	25.1731	3	8733	1153.17	140.16	52.67	192.83	3.16667	3.14762	4	3	3	3	3	3	4	4	3	3	3	4	4	3	4	4	3	3	3	4	2	3	3	4	3	3	3	4	3	4	3	2	2	2	2
310	2	1	164	55.1	17	20.4863	3	8921.84	947.33	152.5	57.33	209.83	2.33333	2.91429	3	2	2	2	3	2	3	3	3	3	3	3	3	2	3	3	3	3	3	3	3	3	3	2	3	3	4	3	3	3	3	2	2	3	3
311	2	1	156	71.6	16	29.4214	1	8170.67	1609.5	177.83	121	298.83	3.5	3.91429	4	4	4	1	4	4	4	4	3	4	4	4	4	4	4	4	4	4	4	4	4	4	4	4	4	4	4	4	4	4	4	4	2	4	4
312	2	0	168.9	64.9	17	22.7502	1	8855.84	905.33	279.66	38.17	317.83	3.83333	4.88571	4	4	4	4	3	4	5	4	5	5	5	5	5	5	5	5	4	4	5	5	5	5	5	5	5	5	5	5	5	5	5	5	4	5	5
313	2	1	169.5	66.6	17	23.1811	3	8729.66	1064.17	166.17	119	285.17	3	3.6	1	1	4	4	4	4	4	3	3	3	3	5	5	5	5	5	3	4	4	4	4	4	4	4	3	3	3	4	4	4	4	2	3	2	2
314	2	1	163.9	49.5	17	18.4267	3	9163.83	663.5	234.5	17.17	251.67	2.83333	4.21905	3	2	3	3	3	3	3	3	4	4	2	5	5	5	5	5	5	5	5	4	4	5	5	5	4	4	5	4	4	4	4	4	3	3	3
315	2	1	157	45.3	17	18.378	3	9210.83	633.67	207.33	27.17	234.5	3.16667	3.02857	3	3	3	4	3	3	3	3	3	3	2	3	3	3	3	4	4	4	4	4	4	3	3	3	3	3	3	3	3	3	3	3	2	2	2
316	2	0	175.6	74.4	17	24.1281	2	9532.5	307	189.17	50.33	239.5	3.5	3.55952	3	3	4	4	3	4	4	5	3	2	5	5	5	4	4	4	2	3	3	4	2	3	4	4	3	4	5	4	5	4	4	1	1	3	3
317	2	1	157.5	62.7	17	25.2759	3	8606.34	1171.33	145.33	156	301.33	4.16667	3.84524	4	4	4	5	4	4	5	4	3	3	3	5	4	5	5	4	3	3	5	4	4	5	4	3	3	3	5	4	4	4	5	4	2	3	3
318	2	1	163.5	75.7	17	28.3179	5	9301.17	635.83	125.67	16.33	142	1.16667	2.37857	1	1	1	1	2	1	4	2	2	2	2	3	3	3	3	3	2	2	2	2	2	3	3	3	2	2	2	2	2	2	3	1	2	3	3
319	2	0	184.3	66.8	17	19.6664	2	9110	748.5	96.33	124.17	220.5	3.33333	3.33333	3	4	3	3	3	4	4	4	4	3	4	4	4	4	4	4	3	3	3	3	4	3	3	3	3	3	4	3	3	3	3	3	3	3	3
320	2	0	176.8	80.5	16	25.7532	2	9409.34	486.83	148.83	34	182.83	3.5	2.98571	4	3	3	4	3	4	3	3	4	4	2	3	3	4	4	4	4	4	4	4	5	1	2	2	2	4	4	2	2	3	3	1	2	3	3
321	2	0	175.6	67.2	17	21.7932	3	9376.83	413.5	203	85.67	288.67	3.66667	3.68571	3	4	4	3	4	4	3	3	3	3	3	4	4	4	4	4	3	4	3	3	4	4	5	5	3	3	4	4	4	4	4	4	2	4	3
322	2	0	164.3	57.4	17	21.2636	3	9037.16	772.67	170.5	98.67	269.17	4	3.80714	4	4	4	4	4	4	4	3	5	3	5	5	5	5	5	3	2	2	3	3	3	5	5	5	5	5	5	2	4	4	3	3	3	2	2
323	2	0	167.5	72.7	17	25.9122	2	8633.34	1195.33	199	51.33	250.33	4.33333	3.71429	4	5	4	5	4	4	4	4	3	4	4	4	4	4	4	3	4	4	4	3	4	4	5	4	3	4	4	4	4	4	4	3	2	3	3
324	2	0	179.4	76.2	18	23.6761	3	8535.17	1285.5	190	68.33	258.33	3.5	3.29286	3	3	3	4	4	4	3	3	3	3	3	4	4	3	3	4	3	3	3	4	3	4	4	4	3	3	3	4	3	3	3	3	3	3	3
325	2	1	160.2	58.1	16	22.6387	2	9052.67	788	153.33	85	238.33	3.33333	3.85952	3	3	3	3	4	4	4	4	3	3	4	5	5	5	5	5	4	4	3	4	3	5	5	5	3	4	4	4	4	3	4	3	3	2	2
326	2	0	180.1	59	18	18.1897	1	9295.33	426.5	275.84	81.33	357.17	4.83333	3.97143	5	5	5	5	5	4	4	3	4	4	4	4	4	5	4	4	4	3	4	3	5	5	5	5	5	5	5	5	5	5	5	1	1	1	1
327	2	0	171.2	51	16	17.4005	2	8525.84	1197.33	199.16	156.67	355.83	4.33333	3.73095	5	4	4	5	4	4	5	5	3	3	5	5	5	4	5	4	2	3	2	4	4	5	5	5	2	2	4	4	4	4	5	2	2	2	3
328	2	0	175	82.2	18	26.8408	2	8995.16	865.17	93.5	125.17	218.67	3.66667	4.37143	5	2	3	4	5	3	5	5	4	4	5	5	5	4	5	5	5	4	3	5	5	5	4	5	3	5	5	5	5	5	5	5	3	4	1
329	2	0	171.5	84.8	18	28.8315	3	8897.84	678.33	462.33	40.5	502.83	4.5	4.54286	5	5	5	4	4	4	4	4	4	3	5	5	5	3	4	4	5	4	4	4	5	5	5	5	5	5	5	5	5	5	5	3	3	5	5
330	2	0	168.4	72.1	18	25.4244	2	9389.84	474.33	131.5	83.33	214.83	3	3.61429	3	3	3	2	3	4	4	5	3	2	3	4	5	4	4	4	4	4	3	3	3	3	3	3	4	2	3	4	3	3	4	4	5	5	5
331	2	1	164.5	48	16	17.7382	2	8252.5	1528.33	237	61.17	298.17	4.83333	4.50952	5	5	5	5	4	5	5	4	5	4	5	5	5	5	5	5	4	4	5	4	4	5	5	5	4	5	5	4	5	4	5	3	4	3	4
332	2	1	171	50.3	16	17.2019	2	8999.5	793	236.83	49.67	286.5	4.16667	4.01905	5	4	4	4	4	4	3	4	5	5	3	4	4	4	4	4	3	3	4	4	4	5	4	4	4	4	4	4	4	4	4	4	5	4	4
333	2	0	180.8	75.7	16	23.1579	1	9206.67	600	224.16	48.17	272.33	3.83333	3.7619	4	3	3	5	4	4	4	3	5	4	3	5	5	5	5	5	3	5	4	3	4	4	4	4	4	3	3	4	4	4	4	3	3	2	3
334	2	1	159	65.5	17	25.9088	3	8915	931.33	155.5	77.17	232.67	3.83333	3.82143	4	3	3	4	4	5	2	3	3	3	2	5	5	5	5	5	3	3	3	4	3	5	5	5	3	3	3	4	5	5	5	3	4	3	3
335	2	1	165.7	58.9	18	21.4521	3	9678.5	137.67	242.16	20.67	262.83	3.83333	3.20238	3	4	4	4	4	4	3	3	3	3	3	4	3	4	4	3	2	3	3	2	3	4	4	3	3	3	3	3	4	4	4	3	3	3	3
336	2	1	164	56.1	17	20.8581	2	9238.33	709.67	115.33	15.67	131	2.16667	2.69524	3	2	2	2	2	2	4	4	4	4	4	3	3	3	3	3	2	3	2	3	3	2	2	2	1	3	4	3	3	3	3	1	3	1	1
337	2	0	170.9	52.9	17	18.1122	2	8869.5	942	231.33	36.17	267.5	3.83333	3.65952	4	4	4	4	3	4	3	2	3	3	4	5	5	3	4	4	3	5	4	5	4	5	5	4	3	3	3	3	4	4	4	3	2	3	3
338	2	1	160	55.9	17	21.8359	3	9124.67	672	255.5	26.83	282.33	4.5	4.42857	4	4	5	5	5	4	5	5	5	5	5	5	5	4	5	5	3	5	4	4	4	5	5	5	4	4	4	5	5	5	5	4	3	3	3
339	2	0	179.3	69.2	17	21.5251	3	8968.67	728.83	263.33	118.17	381.5	3.83333	4.46667	4	4	4	3	3	5	5	5	5	5	5	5	5	4	5	4	4	4	5	5	5	4	4	3	5	5	5	5	5	5	5	5	5	3	2
340	2	1	164.1	55	18	20.4242	3	9308.17	518.83	226.5	25.5	252	3.33333	3.51429	3	3	3	3	5	3	3	3	3	3	3	3	3	3	3	3	3	4	4	4	4	5	4	3	3	3	3	4	4	4	4	4	4	4	4
341	2	1	159	43.2	17	17.0879	3	9388.16	531.17	124.84	34.83	159.67	2.66667	2.66667	3	2	3	3	2	3	2	1	3	3	2	3	3	3	3	3	2	3	3	3	3	2	3	2	3	2	2	3	3	3	3	2	2	3	3
344	2	0	162.4	38.8	17	14.7116	3	9278.66	606.67	148	45.67	193.67	2.83333	2.89286	3	3	3	3	3	2	4	5	1	3	3	3	2	3	3	3	4	5	5	4	5	3	2	2	4	4	3	2	2	3	2	2	2	1	1
345	2	0	172.5	68.5	18	23.0204	2	8814.5	947.33	223.34	93.83	317.17	4	4.54524	4	3	4	5	4	4	5	5	4	4	4	5	5	5	5	5	3	5	4	4	4	5	5	5	4	5	5	4	5	5	5	4	4	4	4
346	2	1	159	49	16	19.3821	2	9062.34	853.83	119.66	43.17	162.83	1.5	2.99048	2	1	2	1	1	2	4	3	3	3	3	4	2	4	3	3	1	5	5	5	5	2	3	3	4	3	4	3	3	3	3	1	1	1	1
347	2	1	164	48	17	17.8465	2	9204.5	584.33	226	64.17	290.17	4	3.97143	4	4	4	4	4	4	4	4	4	4	4	4	4	4	4	4	4	4	4	4	4	4	4	4	4	4	4	4	4	4	4	4	3	4	4
348	2	1	160	55	16	21.4844	1	9296.5	568.5	125.5	88.5	214	3.16667	3.45714	4	3	1	4	4	3	4	4	3	3	4	4	4	3	4	4	3	3	3	2	3	4	4	4	2	4	3	4	4	4	4	3	3	3	3
349	2	1	165	47	17	17.2635	6	8934.17	789	230.66	125.17	355.83	4	3.58095	4	4	4	4	4	4	3	3	4	3	3	4	4	4	4	4	3	3	4	3	3	4	4	4	3	4	4	4	4	4	4	3	3	3	3
350	2	0	181	73	16	22.2826	6	9235.5	653.33	105	85.17	190.17	3.66667	3.4119	4	3	4	3	4	4	4	4	4	4	4	4	4	4	4	4	3	4	4	3	3	3	4	4	3	4	4	3	2	3	3	3	3	2	2
351	2	1	167	53	16	19.0039	6	9013.5	907.33	140.17	18	158.17	3.16667	3.07619	3	3	3	3	4	3	4	3	3	3	3	3	3	3	3	3	3	3	3	2	4	3	4	3	3	3	3	3	3	3	3	3	3	3	3
352	2	1	172	59	18	19.9432	6	8993.84	871.33	179.66	34.17	213.83	3.33333	3.64762	3	3	3	4	3	4	3	3	3	3	4	4	4	4	4	4	4	4	4	3	4	4	4	4	3	3	4	4	4	4	4	3	3	3	3
353	2	0	187	84	16	24.0213	4	8850.33	895.67	268.67	64.33	333	4.16667	3.69762	4	4	4	4	5	4	4	3	3	4	3	4	3	4	4	4	3	4	4	4	4	4	4	4	3	4	3	4	4	3	4	4	4	4	4
354	2	0	175	65	17	21.2245	2	9434.34	415.33	165.33	64	229.33	3.33333	3.52619	4	3	3	3	3	4	5	4	4	3	4	4	4	4	4	4	3	4	4	4	3	4	3	3	4	4	4	4	4	4	3	2	2	2	2
355	2	1	159	50	17	19.7777	1	9008.5	846.5	157.67	66.33	224	3	4.09524	3	2	3	3	4	3	4	5	4	4	5	4	4	4	4	4	4	4	4	4	4	4	3	4	5	5	5	4	4	4	4	4	2	4	4
356	2	0	167	50	16	17.9282	6	8711	915.33	321.84	130.83	452.67	5	4.59048	5	5	5	5	5	5	4	4	3	3	4	5	5	5	5	5	5	5	5	4	4	5	5	5	4	4	5	5	5	5	5	5	3	5	5
357	2	0	175	62	18	20.2449	1	8825.33	869	344.84	39.83	384.67	4.16667	4.2	5	5	5	3	3	4	4	4	4	4	3	5	5	4	5	4	4	4	4	3	4	4	3	5	4	4	4	5	5	5	5	3	3	5	5
358	2	0	171	66	17	22.571	2	8644.5	1077.5	222.83	134.17	357	4.83333	3.97619	5	4	5	5	5	5	4	3	4	4	4	4	4	4	4	4	2	3	3	4	4	4	5	4	4	4	4	5	4	4	5	3	2	5	5
359	2	1	158	52	17	20.83	6	9112.83	674.5	266.84	24.83	291.67	3.16667	3.83333	1	4	4	4	4	2	4	5	3	5	4	4	5	4	4	5	4	5	5	5	5	2	3	3	3	4	4	3	2	3	2	4	4	5	5
360	2	1	156	41	16	16.8475	6	8955.33	852.17	192.83	78.67	271.5	3.66667	3.60952	4	4	4	4	3	3	4	4	3	3	4	4	4	4	4	4	3	3	3	4	4	4	4	4	3	4	4	4	4	4	4	3	1	3	3
361	2	0	180	80	17	24.6914	1	8832.16	870.17	249	127.67	376.67	4.5	4.07619	5	4	4	5	5	4	4	4	4	4	5	4	4	4	4	4	3	4	4	4	5	5	5	5	3	5	5	3	3	3	3	4	4	4	4
362	2	0	177	52	18	16.598	6	9431.34	291.33	280.33	76	356.33	4.16667	3.54762	4	4	5	5	4	3	2	2	2	2	4	4	4	4	4	4	4	5	5	5	5	2	3	5	3	3	3	3	3	4	4	3	3	4	4
363	2	1	163	63	17	23.7118	4	9315.5	538.67	177.5	47.33	224.83	3.16667	3.06429	3	3	3	3	3	4	3	2	3	3	2	4	4	4	4	4	3	3	3	4	3	3	3	3	3	3	3	4	3	3	3	3	3	2	2
364	2	1	165	51	17	18.7328	1	9097.67	682	248.5	50.83	299.33	4.33333	4.49048	4	4	4	5	4	5	5	5	4	4	5	5	5	5	5	5	4	5	4	4	5	5	5	4	4	5	5	4	4	5	5	3	3	4	4
365	2	0	170	76	17	26.2976	3	8709.83	1121	143.17	105	248.17	3	3.50952	3	3	3	3	3	3	4	3	4	3	4	4	4	4	4	4	2	3	3	3	3	4	4	4	3	4	4	4	4	3	3	2	4	3	3
366	2	1	163	43	17	16.1843	2	8961.33	905	180.17	32.5	212.67	3.33333	2.94286	3	3	3	3	3	5	3	3	3	4	3	3	3	3	3	3	3	3	3	3	3	3	3	3	3	3	3	3	3	3	3	3	3	2	2
367	2	0	175	67	17	21.8776	6	9291	619.67	125.16	43.17	168.33	2.33333	3.70476	2	2	2	3	2	3	4	4	4	4	4	4	4	3	4	3	2	4	3	3	3	4	4	4	4	4	5	4	4	4	4	3	3	4	4
368	2	1	159	50	17	19.7777	6	8672.33	1191	127.5	88.17	215.67	3.5	3.65952	3	4	4	3	4	3	4	4	4	4	3	4	4	4	4	4	3	3	4	3	3	4	4	4	4	4	3	3	4	4	4	4	3	3	3
369	2	1	164	50	18	18.5901	6	9062.33	790.17	153.67	72.83	226.5	3.33333	3.4	3	3	3	4	3	4	3	2	3	2	2	5	4	4	4	4	3	4	4	3	4	4	3	4	3	3	4	4	4	4	4	3	3	1	3
370	2	1	159	55	17	21.7555	1	9212.33	481.17	361.5	24	385.5	4.66667	4.57143	4	5	5	5	5	4	5	4	4	4	4	5	5	5	5	5	4	4	4	4	5	5	5	5	5	5	5	5	5	5	5	4	3	4	4
371	2	1	161	62	16	23.9188	4	8982.5	806.17	168.33	122	290.33	4.16667	4.13095	4	4	5	5	4	3	4	5	2	4	5	5	5	4	5	5	3	5	4	5	5	5	4	4	3	5	5	4	5	4	4	3	3	3	2
372	2	1	158	60	18	24.0346	6	9311.17	579.5	144.16	44.17	188.33	2	3.67381	2	2	2	2	2	2	4	4	3	3	4	4	4	4	4	4	3	4	4	3	4	4	4	4	3	4	4	5	4	4	4	3	3	2	3
373	2	1	157	49	17	19.8791	6	8897.67	919	236.83	25.5	262.33	3.83333	3.6381	4	4	4	4	4	3	3	4	4	4	5	4	4	4	4	4	3	4	4	4	4	3	3	3	3	4	4	4	4	4	4	3	3	3	3
374	2	1	163	60	18	22.5827	1	8639.33	1195	150.84	93.83	244.67	3.66667	3.13095	3	4	3	4	3	5	4	4	3	3	4	3	3	3	3	3	3	3	3	3	4	4	3	4	4	4	4	4	3	3	3	1	2	1	1
375	2	0	181	82	17	25.0298	6	8721.5	1027.33	297	33.17	330.17	4.83333	4.16905	5	5	5	5	5	4	5	4	3	3	5	5	4	4	5	4	3	4	5	5	4	5	5	5	4	5	4	4	5	4	4	3	3	3	3
376	2	1	159	51	17	20.1733	6	9474.16	469.17	120.67	15	135.67	2.16667	3.26667	2	2	2	2	3	2	3	3	4	4	5	4	4	3	4	3	2	3	3	3	4	3	3	3	3	2	3	3	3	3	3	4	4	4	3
377	2	0	178	71	16	22.4088	6	8807.16	945.67	206.17	120	326.17	5	4.94286	5	5	5	5	5	5	5	5	4	5	5	5	5	5	5	5	5	5	5	5	5	5	5	5	5	5	5	5	5	5	5	5	4	5	5
378	2	1	163	46	17	17.3134	3	9506.5	213.17	330.16	29.17	359.33	4.16667	4.69762	4	4	5	4	4	4	5	5	5	5	3	5	5	4	5	5	5	5	5	5	5	4	5	5	5	5	4	5	5	4	5	4	4	4	5
379	2	1	168	57	17	20.1956	6	9486.67	438.33	100	54	154	2.83333	2.75238	3	3	3	3	3	2	5	3	3	3	3	4	4	4	4	3	3	3	2	1	3	3	3	4	2	3	2	3	3	3	3	1	1	1	1
380	2	1	174	63	17	20.8086	6	9163.17	710.33	159.17	46.33	205.5	3.33333	3.01429	3	3	3	3	4	4	2	2	3	4	2	4	4	3	3	4	2	5	5	4	4	3	3	2	3	3	4	2	3	3	2	1	1	3	3
381	2	1	161	60	17	23.1473	4	9400.67	427.5	162	88.83	250.83	3.83333	2.95476	3	5	3	4	5	3	3	2	2	2	2	3	3	3	3	3	4	5	4	3	3	4	3	4	2	3	3	3	3	2	3	3	3	2	2
382	2	1	169	58	17	20.3074	6	9032.67	818.5	184.5	43.33	227.83	3.66667	3.51429	4	4	4	4	4	2	4	4	4	4	4	4	4	4	4	4	2	4	4	2	3	4	4	4	3	3	3	4	4	4	4	3	1	3	3
383	2	1	165	53	17	19.4674	2	8950.5	864.5	144	120	264	3.5	3.2	5	3	3	4	3	3	2	2	3	3	4	3	3	3	3	3	4	3	3	4	4	4	3	3	3	4	4	3	3	3	3	3	3	3	3
[truncated: 1 more columns]
